# Supplementary material
Source: PubMed Central journal article supplement (PMC8787685)
Supplement: jama-e220028-s002.pdf [file jama-e220028-s002.pdf]

## Supplemental Online Content

Perkins GD, Ji C, Connolly BA, et al; RECOVERY-RS Collaborators. Effect of noninvasive respiratory strategies on intubation or mortality among patients with acute hypoxemic respiratory failure and COVID-19: the RECOVERY-RS randomized clinical trial. *JAMA*. Published January 24, 2022. doi:10.1001/jama.2022.0028

**eFigure 1.** RECOVERY-RS trial recruitment and UK hospitalized COVID-19 patients

**eFigure 2.** Kaplan Meier curve by treatment arm: time to tracheal intubation (all participants)

**eFigure 3.** Kaplan Meier curve by treatment arm: duration of invasive ventilation (intubated participants only)

**eFigure 4.** Kaplan Meier curve by treatment arm: time to death (all participants)

**eFigure 5.** Adjusted sub-group analyses: tracheal Intubation or mortality within 30 days

**eTable 1.** Summary of randomizations and data for pairwise comparisons

**eTable 2.** Additional participant baseline characteristics

**eTable 3.** Summary of trial crossover by treatment group

**eTable 4.** Inverse probability weighting analysis

**eTable 5.** Primary outcome comparison between continuous positive airway pressure and high-flow nasal oxygen

**eTable 6.** Adverse events and serious adverse events by treatment arm

This supplemental material has been provided by the authors to give readers additional information about their work.

**eFigure 1.** RECOVERY-RS trial recruitment and UK hospitalized COVID-19 patients

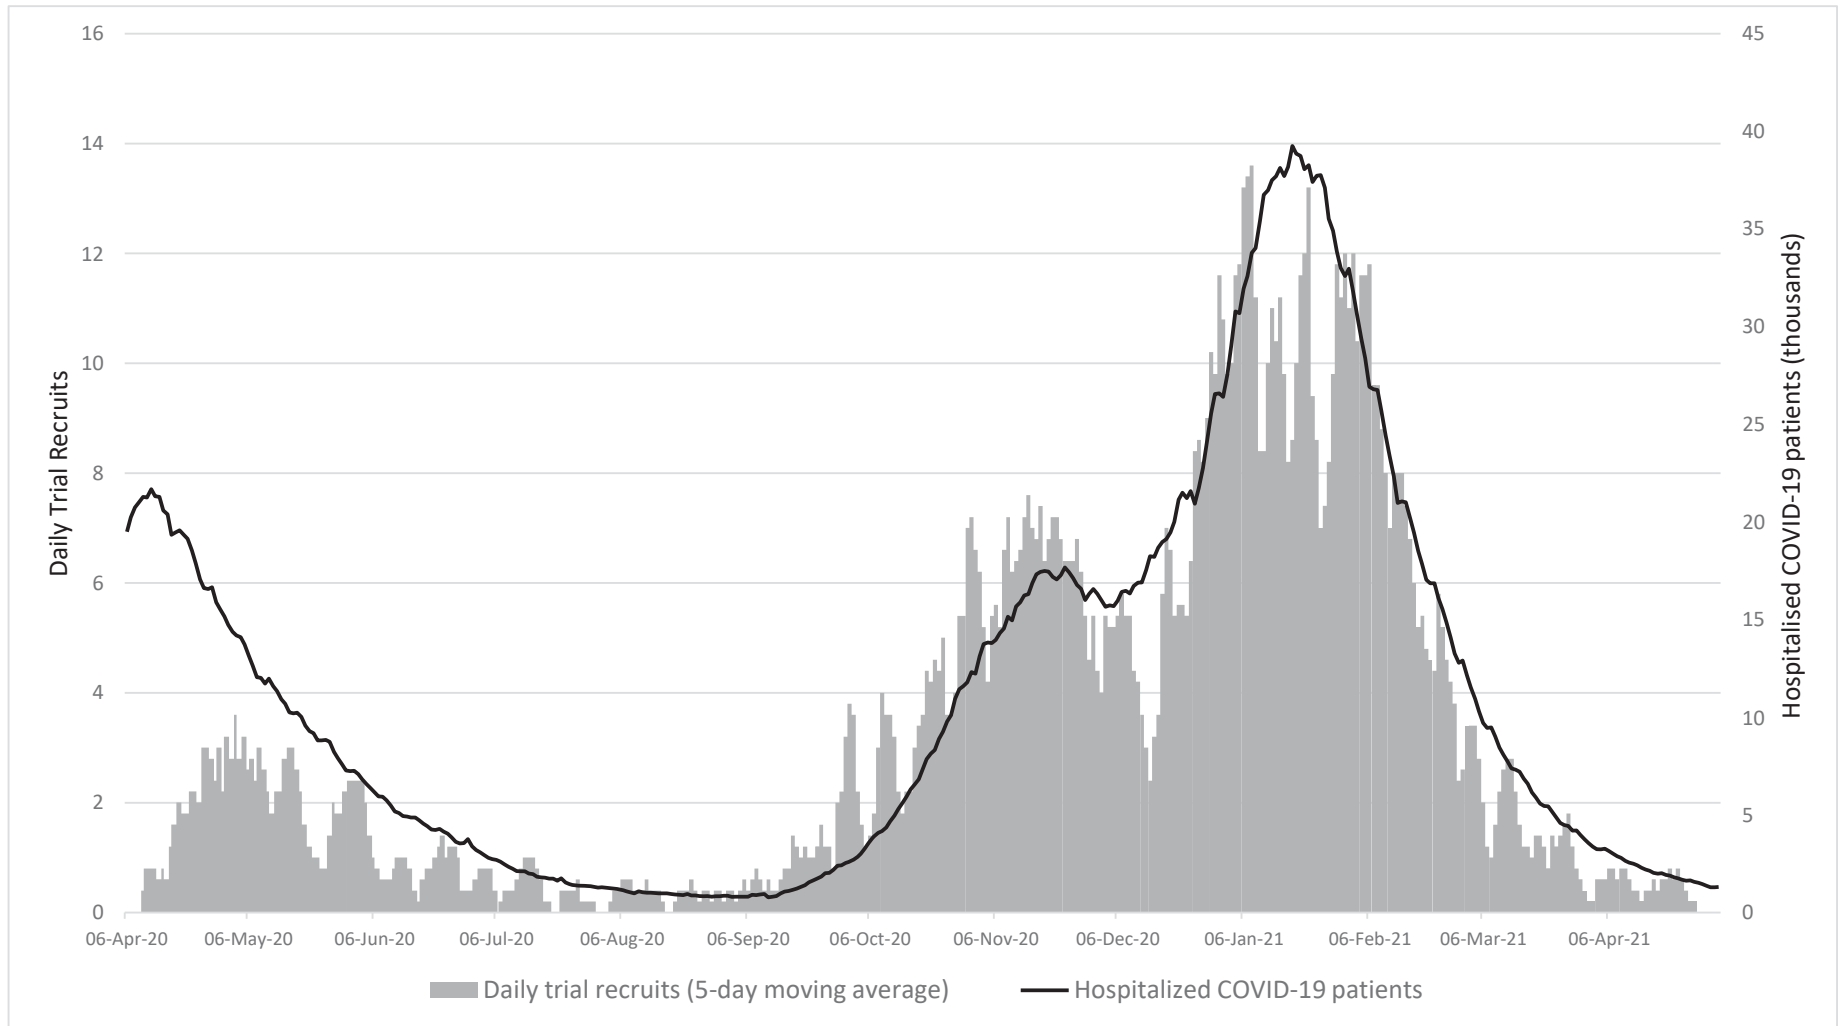

Data for hospitalized COVID-19 patients extracted from publicly available UK data sources at <https://coronavirus.data.gov.uk/details/healthcare>

**eFigure 2.** Kaplan Meier curve by treatment arm: time to tracheal intubation (all participants)

Panel a- Continuous positive airway pressure v conventional oxygen therapy

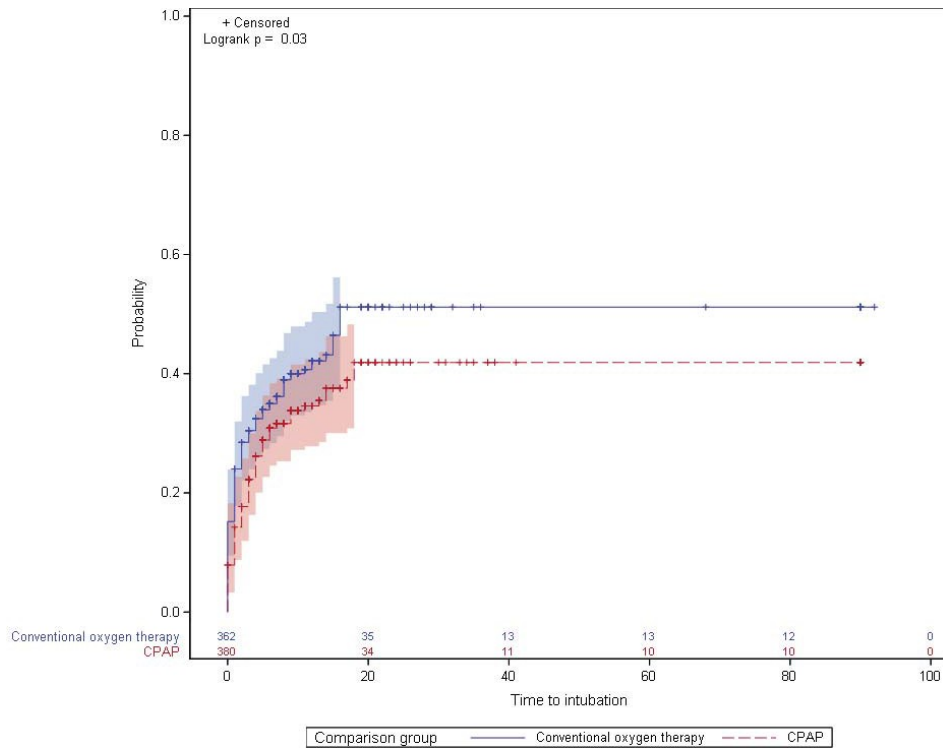

Panel b- High-flow nasal oxygen v conventional oxygen therapy

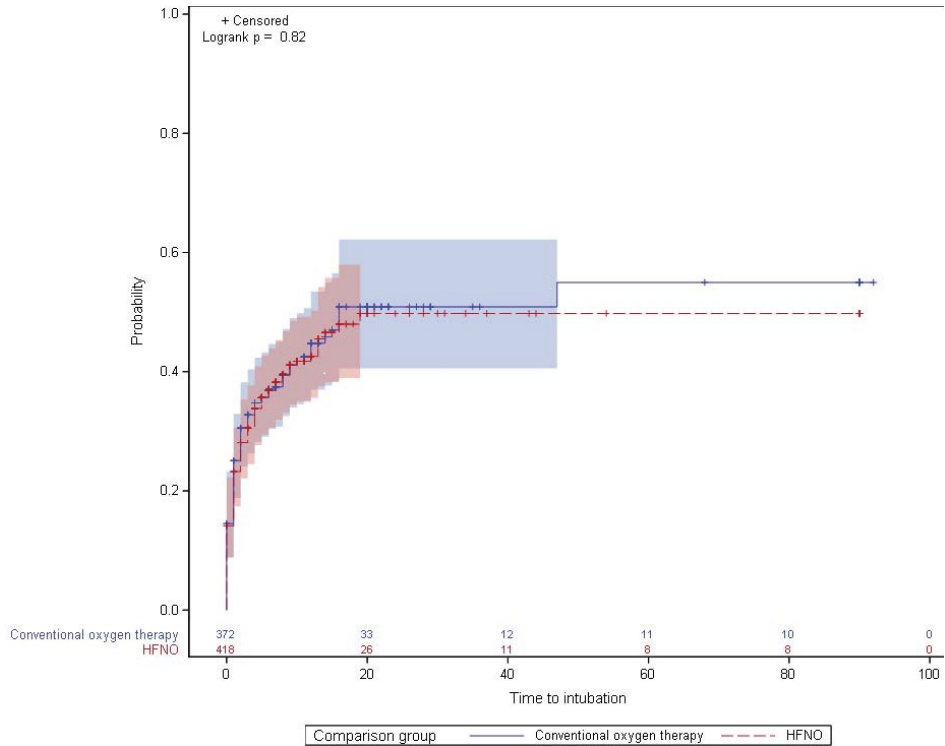

Censored patients include 1) patients died before hospital discharge; 2) patients discharged alive from hospital without intubation; 3) patients lost to follow-up (including complete withdrawals before intubation was given and complete missing in-hospital data). Proportional hazard assumption was not violated in HFNO vs Conventional oxygen therapy ( $p=0.81$ ). The test p value was 0.01 in CPAP vs Conventional oxygen therapy, respectively, indicating violation of assumption.

**eFigure 3.** Kaplan Meier curve by treatment arm: duration of invasive ventilation (intubated participants only)

Panel a- Continuous positive airway pressure v conventional oxygen therapy

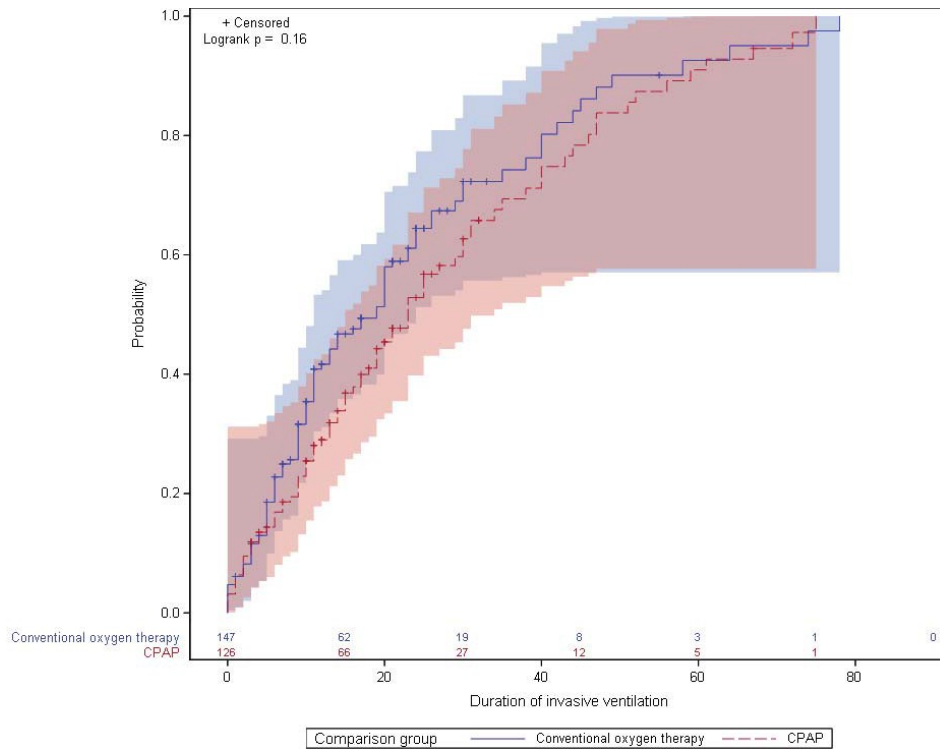

Panel b- High-flow nasal oxygen v conventional oxygen therapy

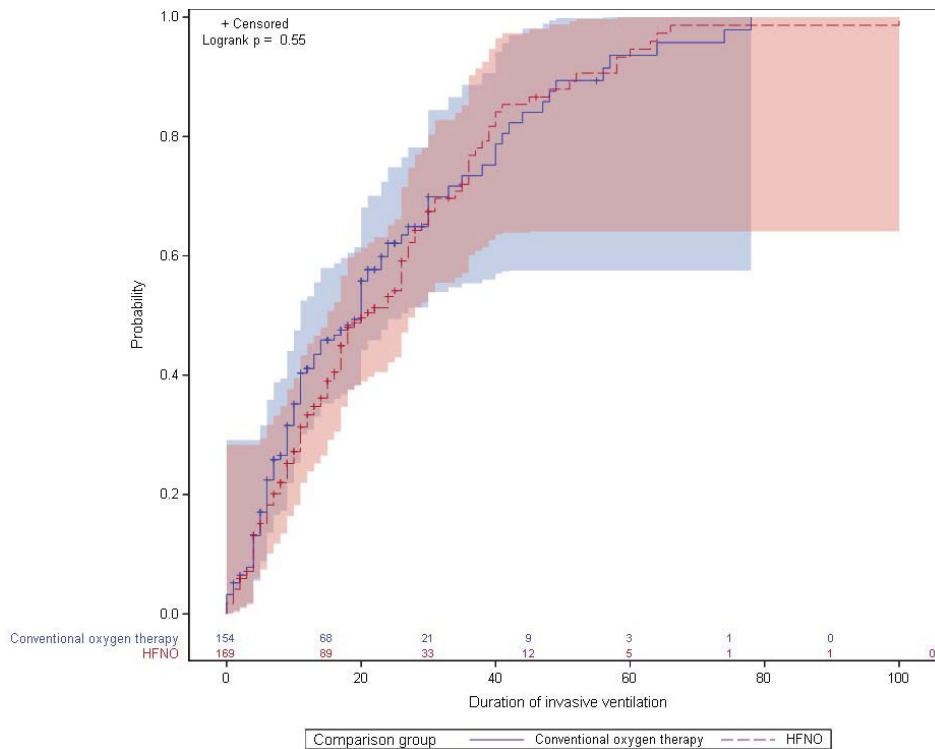

Censored patients include: 1) patients died before coming off invasive ventilation alive; 2) patients withdrew completely before the end of invasive ventilation; 3) patients stayed on invasive ventilation beyond the follow-up period (20th June, 2021); 4) patient died in hospital or discharged alive without intubation.

Proportional hazard assumption was not violated (p=0.54 and 0.32 in CPAP vs Conventional oxygen therapy and HFNO vs Conventional oxygen therapy, respectively).

**eFigure 4.** Kaplan Meier curve by treatment arm: time to death (all participants)

Panel a- Continuous positive airway pressure v conventional oxygen therapy

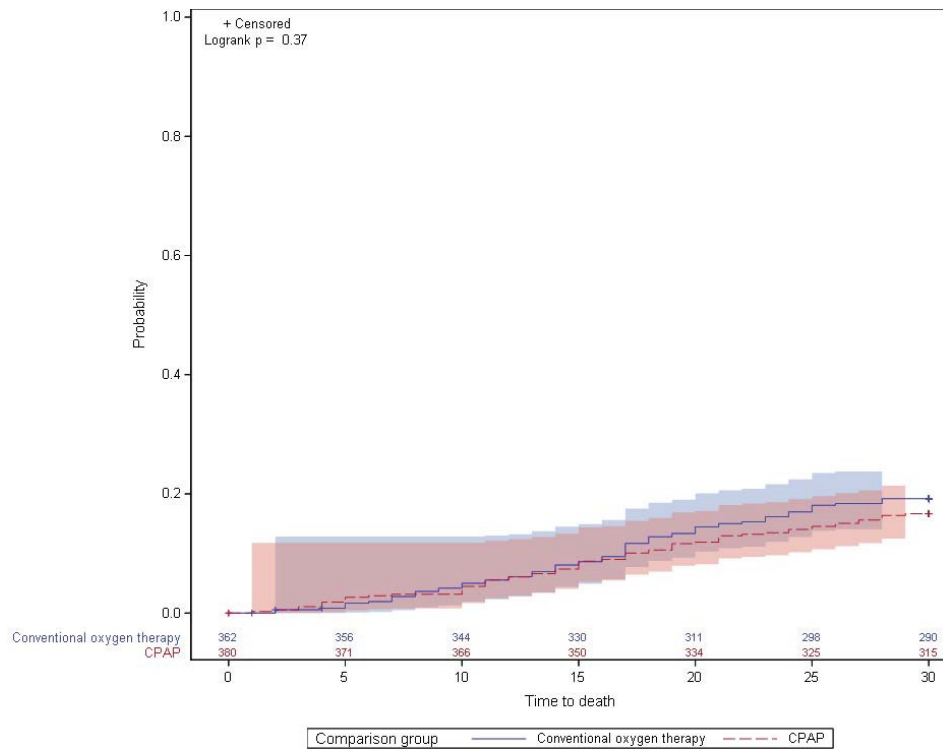

Panel b- High-flow nasal oxygen v conventional oxygen therapy

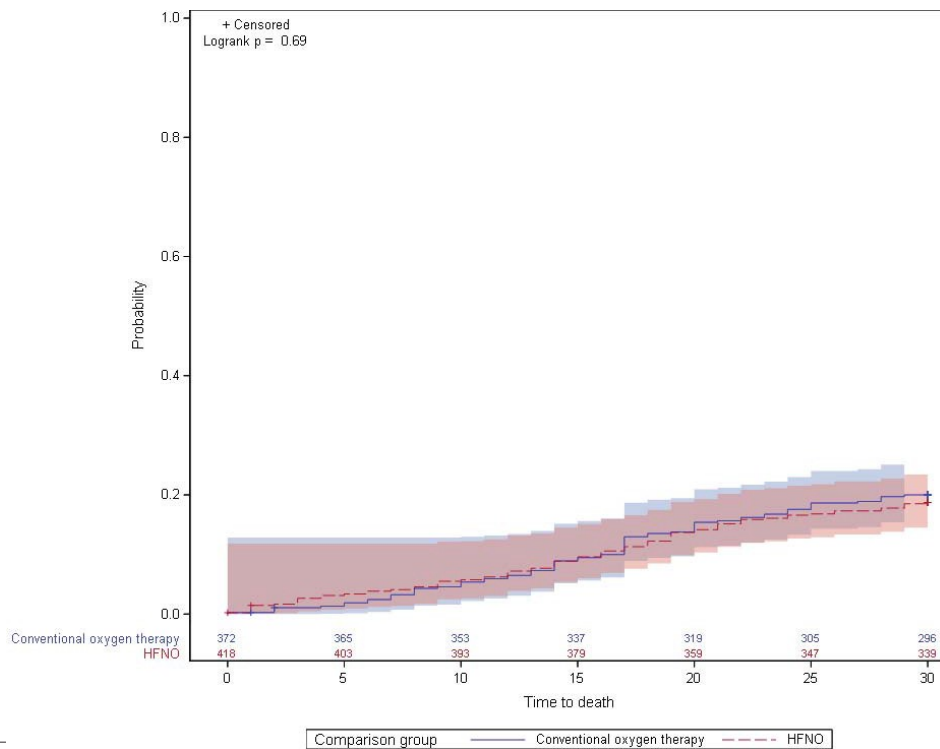

Censored patients include: 1) patient withdrew completely before 30 days from randomisation; 2) patient survived at 30 days. Proportional hazard assumption was not violated ( $p=0.89$  and  $0.64$  in CPAP vs Conventional oxygen therapy and HFNO vs Conventional oxygen therapy, respectively).

**eFigure 5. Adjusted sub-group analyses: tracheal Intubation or mortality within 30 days**

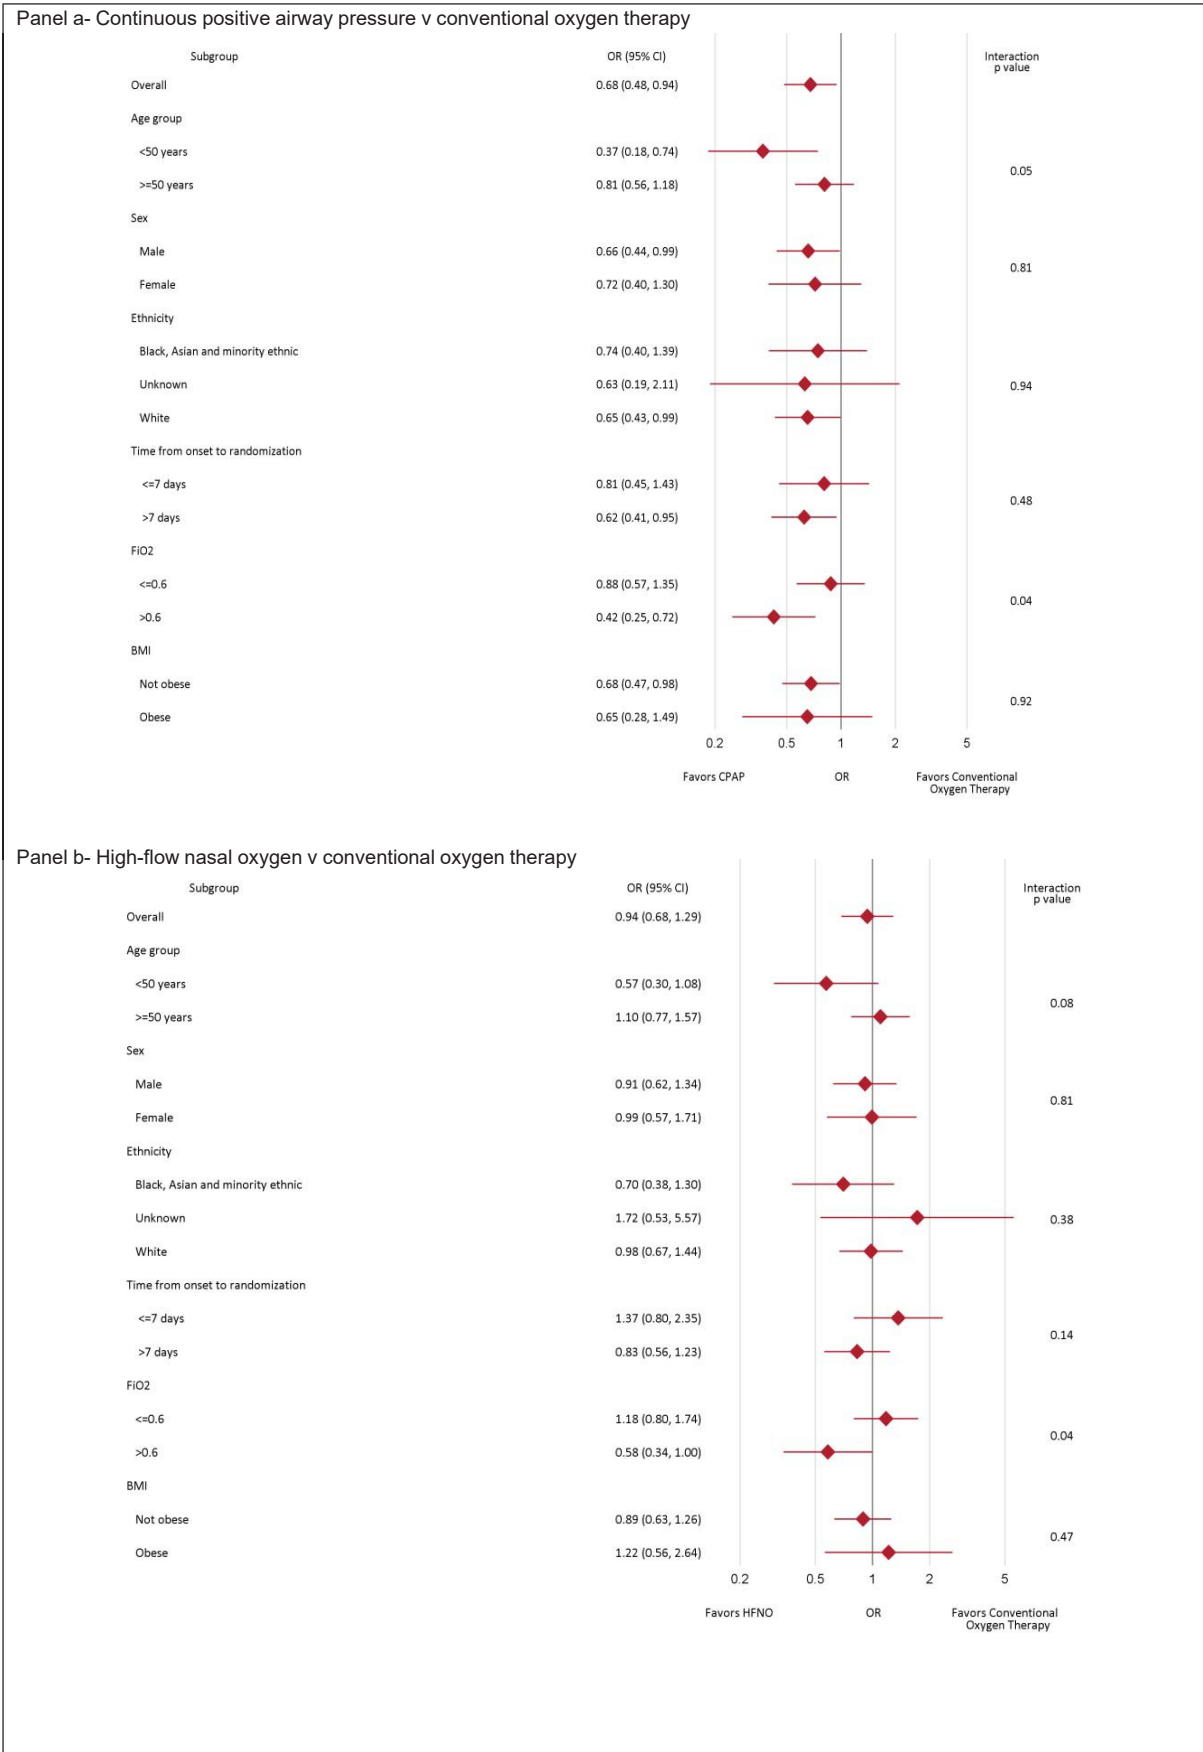

Obese defined as body mass index  $>35$  kg/m<sup>2</sup>. Models adjusted for age, sex, morbid obesity, ethnicity, FiO<sub>2</sub>, respiratory rate and treatment phases, with site included as a random effect. The Unknown ethnicity refers to a participant selected category of "not given". The p values are calculated using the test for interaction between the sub-group and treatment variables. Key: BMI- body mass index; CPAP- Continuous Positive Airway Pressure; FiO<sub>2</sub>- fraction of inspired oxygen; HFNO- High-flow nasal oxygen

**eTable 1.** Summary of randomizations and data for pairwise comparisons

| Randomization                              | Treatment group |             |                             |
|--------------------------------------------|-----------------|-------------|-----------------------------|
|                                            | CPAP            | HFNO        | CONVENTIONAL OXYGEN THERAPY |
| <b>Device availability</b>                 |                 |             |                             |
| CPAP and conventional oxygen therapy only  | 114             | NA          | 103                         |
| HFNO and conventional oxygen therapy only  | NA              | 109         | 113                         |
| CPAP, HFNO and conventional oxygen therapy | 266             | 309         | 259                         |
| Total                                      | 380             | 418         | 475                         |
| Pairwise comparison                        | Treatment group |             |                             |
|                                            | CPAP            | HFNO        | CONVENTIONAL OXYGEN THERAPY |
| CPAP vs CONVENTIONAL OXYGEN THERAPY        | 380 (51.2%)     | NA          | 362 (48.8%)                 |
| HFNO vs CONVENTIONAL OXYGEN THERAPY        | NA              | 418 (52.9%) | 372 (47.1%)                 |

Key: CPAP- Continuous Positive Airway Pressure; HFNO- High-flow nasal oxygen



**eTable 2.** Additional participant baseline characteristics

| Characteristic                                                                                                                                                                                                                                                        | CPAP                | HFNO                | Conventional Oxygen Therapy |
|-----------------------------------------------------------------------------------------------------------------------------------------------------------------------------------------------------------------------------------------------------------------------|---------------------|---------------------|-----------------------------|
| Core body temperature at hospital admission (°C)- Mean (SD)                                                                                                                                                                                                           | 37.7 (1.0), n=377   | 37.7 (1.0), n=414   | 37.6 (1.0), n=472           |
| Heart Rate (per minute)- Mean (SD)                                                                                                                                                                                                                                    | 91.1 (17.0), n=371  | 90.4 (15.8), n=410  | 88.7 (16.7), n=469          |
| Systolic blood pressure (mmHg)- Mean (SD)                                                                                                                                                                                                                             | 128.6 (19.0), n=377 | 128.4 (18.2), n=414 | 127.3 (18.1), n=473         |
| Diastolic blood pressure (mmHg)- Mean (SD)                                                                                                                                                                                                                            | 75.2 (12.4), n=374  | 75.4 (12.2), n=414  | 75.6 (11.2), n=473          |
| Urea (mmol/l)- Mean (SD)                                                                                                                                                                                                                                              | 39.4 (23.7), n=372  | 41.1 (25.0), n=410  | 39.4 (23.9), n=464          |
| Confusion – no. (%)                                                                                                                                                                                                                                                   |                     |                     |                             |
| Confused                                                                                                                                                                                                                                                              | 14 (3.7)            | 9 (2.2)             | 9 (1.9)                     |
| Not confused                                                                                                                                                                                                                                                          | 364 (95.8)          | 407 (97.4)          | 461 (97.1)                  |
| N/A- sedated                                                                                                                                                                                                                                                          | 0                   | 1 (0.2)             | 1 (0.2)                     |
| CURB-65 Score – no. (%)                                                                                                                                                                                                                                               |                     |                     |                             |
| 0                                                                                                                                                                                                                                                                     | 133 (35.0)          | 136 (32.5)          | 171 (36.0)                  |
| 1                                                                                                                                                                                                                                                                     | 129 (34.0)          | 151 (36.1)          | 175 (36.8)                  |
| 2                                                                                                                                                                                                                                                                     | 71 (18.7)           | 85 (20.3)           | 89 (18.7)                   |
| 3                                                                                                                                                                                                                                                                     | 30 (7.9)            | 29 (6.9)            | 22 (4.6)                    |
| 4                                                                                                                                                                                                                                                                     | 2 (0.5)             | 4 (1.0)             | 3 (0.6)                     |
| 5                                                                                                                                                                                                                                                                     | 0 (0.0)             | 0 (0.0)             | 1 (0.2)                     |
| Clinical Frailty Scale (pre-admission) no. (%) <sup>a</sup>                                                                                                                                                                                                           |                     |                     |                             |
| CFS1 - Very Fit                                                                                                                                                                                                                                                       | 72 (18.9%)          | 71 (17.0%)          | 62 (13.1%)                  |
| CFS2 - Well                                                                                                                                                                                                                                                           | 192 (50.5%)         | 196 (46.9%)         | 237 (49.9%)                 |
| CFS3 - Managing Well                                                                                                                                                                                                                                                  | 87 (22.9%)          | 109 (26.1%)         | 131 (27.6%)                 |
| CFS4 - Vulnerable                                                                                                                                                                                                                                                     | 12 (3.2%)           | 27 (6.5%)           | 30 (6.3%)                   |
| CFS5 - Mildly Frail                                                                                                                                                                                                                                                   | 4 (1.1%)            | 6 (1.4%)            | 6 (1.3%)                    |
| CFS6 - Moderately Frail                                                                                                                                                                                                                                               | 3 (0.8%)            | 0 (0.0%)            | 3 (0.6%)                    |
| CFS7 - Severely Frail                                                                                                                                                                                                                                                 | 0 (0.0%)            | 2 (0.5%)            | 0 (0.0%)                    |
| CFS8 - Very Severely Frail                                                                                                                                                                                                                                            | 0 (0.0%)            | 0 (0.0%)            | 0 (0.0%)                    |
| CFS9 - Terminally Ill                                                                                                                                                                                                                                                 | 0 (0.0%)            | 0 (0.0%)            | 0 (0.0%)                    |
| <p>a- The clinical frailty score is based on pre-admission functional status and determined through notes review or patient assessment. It is measured on a nine-point score (very fit to terminally ill), with lower scores indicating a lower level of frailty.</p> |                     |                     |                             |
| <p>Key: CPAP- Continuous Positive Airway Pressure; HFNO- High-flow nasal oxygen</p>                                                                                                                                                                                   |                     |                     |                             |

**eTable 3.** Summary of trial crossover by treatment group

| <b>Category of crossover</b>                                                 | <b>n/N (%)</b> |
|------------------------------------------------------------------------------|----------------|
| Participants randomized to CPAP                                              |                |
| Received HFNO                                                                | 58/380 (15.3%) |
| Participants randomized to HFNO                                              |                |
| Received CPAP                                                                | 48/418 (11.5%) |
| Participants randomized to conventional oxygen therapy                       |                |
| Received CPAP                                                                | 40/475 (8.4%)  |
| Received HFNO                                                                | 36/475 (7.6%)  |
| Received both CPAP and HFNO                                                  | 36/475 (7.6%)  |
| Key: CPAP- Continuous Positive Airway Pressure; HFNO- High-flow nasal oxygen |                |

**eTable 4.** Inverse probability weighting analysis

|                                                                                                                  | CPAP versus Conventional Oxygen Therapy <sup>a</sup> |                      | HFNO versus Conventional Oxygen Therapy <sup>b</sup> |                      |
|------------------------------------------------------------------------------------------------------------------|------------------------------------------------------|----------------------|------------------------------------------------------|----------------------|
|                                                                                                                  | Unadjusted                                           | Adjusted             | Unadjusted                                           | Adjusted             |
| Tracheal Intubation or mortality within 30 days <sup>c</sup> - Odds ratio (95% confidence interval) <sup>c</sup> | 0.65<br>(0.44, 0.96)                                 | 0.62<br>(0.39, 0.96) | 1.05<br>(0.71, 1.55)                                 | 0.98<br>(0.64, 1.52) |

Key: CPAP- Continuous Positive Airway Pressure; HFNO- High-flow nasal oxygen  
a) Includes patients randomized between CPAP and conventional oxygen therapy, or between CPAP, HFNO, and conventional oxygen therapy.  
b) Includes patients randomized between HFNO and conventional oxygen therapy, or between CPAP, HFNO, and conventional oxygen therapy  
c) Inverse probability weighting was used to take into account crossovers in each treatment arm. Weights were estimated using baseline covariates, including age, sex, ethnicity, treatment phases, FiO2, PaO2, comorbidity status, heart rate, respiratory rate, Clinical Frailty Scale. Bootstrapping was used to obtain 95% confidence intervals.

**eTable 5.** Primary outcome comparison between continuous positive airway pressure and high-flow nasal oxygen

| CPAP versus HFNO                                                                                                                                                                                                                                                                                                                                                                                                                              | CPAP           | HFNO            | Absolute difference (95% CI) | Unadjusted odds ratio (95% CI) | Adjusted odds ratio <sup>b</sup> (95% CI) | P value (unad, adj) |
|-----------------------------------------------------------------------------------------------------------------------------------------------------------------------------------------------------------------------------------------------------------------------------------------------------------------------------------------------------------------------------------------------------------------------------------------------|----------------|-----------------|------------------------------|--------------------------------|-------------------------------------------|---------------------|
| <b>Primary composite outcome</b>                                                                                                                                                                                                                                                                                                                                                                                                              |                |                 |                              |                                |                                           |                     |
| Tracheal Intubation or mortality within 30 days <sup>a</sup> .                                                                                                                                                                                                                                                                                                                                                                                | 91/263 (34.6%) | 136/307 (44.3%) | -10% (-18%- -2%)             | 0.67 (0.47, 0.93)              | 0.68 (0.47, 0.99)                         | 0.02, 0.04          |
| <b>Primary composite outcome components</b>                                                                                                                                                                                                                                                                                                                                                                                                   |                |                 |                              |                                |                                           |                     |
| Intubation within 30 days                                                                                                                                                                                                                                                                                                                                                                                                                     | 84/263 (31.9%) | 125/307 (40.7%) | -9% (-17%- -1%)              | 0.68 (0.48, 0.96)              | 0.68 (0.46, 0.99)                         | 0.03, 0.05          |
| Mortality at 30 days(%)                                                                                                                                                                                                                                                                                                                                                                                                                       | 43/264 (16.3%) | 58/308 (18.8%)  | -3% (-9%- 4%)                | 0.84 (0.54, 1.29)              | 1.00 (0.61, 1.63)                         | 0.43, 0.99          |
| <p>Data are n/N (%)<br/>           Key- CPAP- Continuous Positive Airway Pressure; HFNO- High-flow nasal oxygen<br/>           The % are based on excluding missing data (i.e. withdrawals and no data provided).<br/>           a- The final critical p value is 5%;<br/>           b- Models were adjusted for age, sex, morbid obesity, ethnicity, FiO2, respiratory rate and treatment phases, with site included as a random effect.</p> |                |                 |                              |                                |                                           |                     |

**eTable 6.** Adverse events and serious adverse events by treatment group

|                                                                                                                                                                                                                                                                                                                                                                                                                                                                                                                                                                                                                                                                                                                                                                                                                                                                                                                                                                                                                                                                                                                                                                                                                                                                                                                                                                                                         | CPAP<br>(n=380) | HFNO<br>(n=418) | Conventional<br>oxygen<br>therapy<br>(n=475) | P-<br>value <sup>a</sup> | All<br>participants<br>(n=1273) |
|---------------------------------------------------------------------------------------------------------------------------------------------------------------------------------------------------------------------------------------------------------------------------------------------------------------------------------------------------------------------------------------------------------------------------------------------------------------------------------------------------------------------------------------------------------------------------------------------------------------------------------------------------------------------------------------------------------------------------------------------------------------------------------------------------------------------------------------------------------------------------------------------------------------------------------------------------------------------------------------------------------------------------------------------------------------------------------------------------------------------------------------------------------------------------------------------------------------------------------------------------------------------------------------------------------------------------------------------------------------------------------------------------------|-----------------|-----------------|----------------------------------------------|--------------------------|---------------------------------|
| Participants with AE/ SAE- n (%)                                                                                                                                                                                                                                                                                                                                                                                                                                                                                                                                                                                                                                                                                                                                                                                                                                                                                                                                                                                                                                                                                                                                                                                                                                                                                                                                                                        | 130 (34.2%)     | 86 (20.6%)      | 66 (13.9%)                                   | <0.001                   | 282 (22.2%)                     |
| <b>ADVERSE EVENTS</b>                                                                                                                                                                                                                                                                                                                                                                                                                                                                                                                                                                                                                                                                                                                                                                                                                                                                                                                                                                                                                                                                                                                                                                                                                                                                                                                                                                                   |                 |                 |                                              |                          |                                 |
| Participants with AE- n (%)                                                                                                                                                                                                                                                                                                                                                                                                                                                                                                                                                                                                                                                                                                                                                                                                                                                                                                                                                                                                                                                                                                                                                                                                                                                                                                                                                                             | 130 (34.2%)     | 86 (20.6%)      | 65 (13.7%)                                   | <0.001                   | 281 (22.1%)                     |
| <b>Summary of events- n(%)<sup>b</sup></b>                                                                                                                                                                                                                                                                                                                                                                                                                                                                                                                                                                                                                                                                                                                                                                                                                                                                                                                                                                                                                                                                                                                                                                                                                                                                                                                                                              |                 |                 |                                              |                          |                                 |
| Interface/therapy Intolerance                                                                                                                                                                                                                                                                                                                                                                                                                                                                                                                                                                                                                                                                                                                                                                                                                                                                                                                                                                                                                                                                                                                                                                                                                                                                                                                                                                           | 22 (5.8%)       | 3 (0.7%)        | 1 (0.2%)                                     |                          | 26 (2.0%)                       |
| Pain                                                                                                                                                                                                                                                                                                                                                                                                                                                                                                                                                                                                                                                                                                                                                                                                                                                                                                                                                                                                                                                                                                                                                                                                                                                                                                                                                                                                    | 21 (5.5%)       | 10 (2.4%)       | 6 (1.3%)                                     | -                        | 37 (2.9%)                       |
| Cutaneous pressure sore                                                                                                                                                                                                                                                                                                                                                                                                                                                                                                                                                                                                                                                                                                                                                                                                                                                                                                                                                                                                                                                                                                                                                                                                                                                                                                                                                                                 | 32 (8.4%)       | 14 (3.4%)       | 14 (2.9%)                                    | -                        | 60 (4.7%)                       |
| Claustrophobia                                                                                                                                                                                                                                                                                                                                                                                                                                                                                                                                                                                                                                                                                                                                                                                                                                                                                                                                                                                                                                                                                                                                                                                                                                                                                                                                                                                          | 46 (12.1%)      | 10 (2.4%)       | 9 (1.9%)                                     | -                        | 65 (5.1%)                       |
| Oronasal dryness                                                                                                                                                                                                                                                                                                                                                                                                                                                                                                                                                                                                                                                                                                                                                                                                                                                                                                                                                                                                                                                                                                                                                                                                                                                                                                                                                                                        | 25 (6.6%)       | 25 (6.0%)       | 9 (1.9%)                                     | -                        | 59 (4.6%)                       |
| Respiratory acidosis                                                                                                                                                                                                                                                                                                                                                                                                                                                                                                                                                                                                                                                                                                                                                                                                                                                                                                                                                                                                                                                                                                                                                                                                                                                                                                                                                                                    | 4 (1.1%)        | 11 (2.6%)       | 4 (0.8%)                                     | -                        | 19 (1.5%)                       |
| Haemodynamic instability                                                                                                                                                                                                                                                                                                                                                                                                                                                                                                                                                                                                                                                                                                                                                                                                                                                                                                                                                                                                                                                                                                                                                                                                                                                                                                                                                                                | 43 (11.3%)      | 34 (8.1%)       | 29 (6.1%)                                    | -                        | 106 (8.3%)                      |
| Nausea and vomiting                                                                                                                                                                                                                                                                                                                                                                                                                                                                                                                                                                                                                                                                                                                                                                                                                                                                                                                                                                                                                                                                                                                                                                                                                                                                                                                                                                                     | 9 (2.4%)        | 10 (2.4%)       | 6 (1.3%)                                     | -                        | 25 (2.0%)                       |
| Aspiration of gastric contents                                                                                                                                                                                                                                                                                                                                                                                                                                                                                                                                                                                                                                                                                                                                                                                                                                                                                                                                                                                                                                                                                                                                                                                                                                                                                                                                                                          | 6 (1.6%)        | 5 (1.2%)        | 2 (0.4%)                                     | -                        | 13 (1.0%)                       |
| Pneumothorax                                                                                                                                                                                                                                                                                                                                                                                                                                                                                                                                                                                                                                                                                                                                                                                                                                                                                                                                                                                                                                                                                                                                                                                                                                                                                                                                                                                            | 7 (1.8%)        | 8 (1.9%)        | 10 (2.1%)                                    | -                        | 25 (2.0%)                       |
| Pneumomediastinum                                                                                                                                                                                                                                                                                                                                                                                                                                                                                                                                                                                                                                                                                                                                                                                                                                                                                                                                                                                                                                                                                                                                                                                                                                                                                                                                                                                       | 12 (3.2%)       | 3 (0.7%)        | 5 (1.1%)                                     | -                        | 20 (1.6%)                       |
| Anxiety and confusion                                                                                                                                                                                                                                                                                                                                                                                                                                                                                                                                                                                                                                                                                                                                                                                                                                                                                                                                                                                                                                                                                                                                                                                                                                                                                                                                                                                   | 6 (1.6%)        | 3 (0.7%)        | 0                                            | -                        | 9 (0.7%)                        |
| Pulmonary embolism                                                                                                                                                                                                                                                                                                                                                                                                                                                                                                                                                                                                                                                                                                                                                                                                                                                                                                                                                                                                                                                                                                                                                                                                                                                                                                                                                                                      | 1 (0.3%)        | 0               | 1 (0.2%)                                     | -                        | 2 (0.2%)                        |
| Surgical emphysema                                                                                                                                                                                                                                                                                                                                                                                                                                                                                                                                                                                                                                                                                                                                                                                                                                                                                                                                                                                                                                                                                                                                                                                                                                                                                                                                                                                      | 3 (0.8%)        | 1 (0.2%)        | 0                                            | -                        | 4 (0.3%)                        |
| Haemoptysis                                                                                                                                                                                                                                                                                                                                                                                                                                                                                                                                                                                                                                                                                                                                                                                                                                                                                                                                                                                                                                                                                                                                                                                                                                                                                                                                                                                             | 1 (0.3%)        | 1 (0.2%)        | 0                                            | -                        | 2 (0.2%)                        |
| Other <sup>c</sup>                                                                                                                                                                                                                                                                                                                                                                                                                                                                                                                                                                                                                                                                                                                                                                                                                                                                                                                                                                                                                                                                                                                                                                                                                                                                                                                                                                                      | 5 (1.3%)        | 8 (1.9%)        | 1 (0.2%)                                     | -                        | 14 (1.1%)                       |
| <b>SERIOUS ADVERSE EVENTS</b>                                                                                                                                                                                                                                                                                                                                                                                                                                                                                                                                                                                                                                                                                                                                                                                                                                                                                                                                                                                                                                                                                                                                                                                                                                                                                                                                                                           |                 |                 |                                              |                          |                                 |
| Participants with SAE- n (%) <sup>b,d</sup>                                                                                                                                                                                                                                                                                                                                                                                                                                                                                                                                                                                                                                                                                                                                                                                                                                                                                                                                                                                                                                                                                                                                                                                                                                                                                                                                                             | 7 (1.8%)        | 0 (0.0%)        | 1 (0.2%)                                     | 0.002                    | 8 (0.6%)                        |
| <b>Impact of SAE</b>                                                                                                                                                                                                                                                                                                                                                                                                                                                                                                                                                                                                                                                                                                                                                                                                                                                                                                                                                                                                                                                                                                                                                                                                                                                                                                                                                                                    |                 |                 |                                              |                          |                                 |
| Death                                                                                                                                                                                                                                                                                                                                                                                                                                                                                                                                                                                                                                                                                                                                                                                                                                                                                                                                                                                                                                                                                                                                                                                                                                                                                                                                                                                                   | 1 (0.3%)        | 0 (0.0%)        | 1 (0.2%)                                     |                          | 2 (0.2%)                        |
| Life Threatening                                                                                                                                                                                                                                                                                                                                                                                                                                                                                                                                                                                                                                                                                                                                                                                                                                                                                                                                                                                                                                                                                                                                                                                                                                                                                                                                                                                        | 4 (1.1%)        | 0 (0.0%)        | 0 (0.0%)                                     |                          | 4 (0.3%)                        |
| Hospitalisation                                                                                                                                                                                                                                                                                                                                                                                                                                                                                                                                                                                                                                                                                                                                                                                                                                                                                                                                                                                                                                                                                                                                                                                                                                                                                                                                                                                         | 6 (1.6%)        | 0 (0.0%)        | 0 (0.0%)                                     |                          | 6 (0.5%)                        |
| Disability                                                                                                                                                                                                                                                                                                                                                                                                                                                                                                                                                                                                                                                                                                                                                                                                                                                                                                                                                                                                                                                                                                                                                                                                                                                                                                                                                                                              | 1 (0.3%)        | 0 (0.0%)        | 0 (0.0%)                                     |                          | 1 (0.1%)                        |
| Birth Defect                                                                                                                                                                                                                                                                                                                                                                                                                                                                                                                                                                                                                                                                                                                                                                                                                                                                                                                                                                                                                                                                                                                                                                                                                                                                                                                                                                                            | 0 (0.0%)        | 0 (0.0%)        | 0 (0.0%)                                     |                          | 0 (0.0%)                        |
| Required Intervention                                                                                                                                                                                                                                                                                                                                                                                                                                                                                                                                                                                                                                                                                                                                                                                                                                                                                                                                                                                                                                                                                                                                                                                                                                                                                                                                                                                   | 4 (1.1%)        | 0 (0.0%)        | 0 (0.0%)                                     |                          | 4 (0.3%)                        |
| <b>Causality of SAE</b>                                                                                                                                                                                                                                                                                                                                                                                                                                                                                                                                                                                                                                                                                                                                                                                                                                                                                                                                                                                                                                                                                                                                                                                                                                                                                                                                                                                 |                 |                 |                                              |                          |                                 |
| Definitely                                                                                                                                                                                                                                                                                                                                                                                                                                                                                                                                                                                                                                                                                                                                                                                                                                                                                                                                                                                                                                                                                                                                                                                                                                                                                                                                                                                              | 0 (0.0%)        | 0 (0.0%)        | 0 (0.0%)                                     |                          | 0 (0.0%)                        |
| Probably                                                                                                                                                                                                                                                                                                                                                                                                                                                                                                                                                                                                                                                                                                                                                                                                                                                                                                                                                                                                                                                                                                                                                                                                                                                                                                                                                                                                | 1 (0.3%)        | 0 (0.0%)        | 0 (0.0%)                                     |                          | 1 (0.1%)                        |
| Possibly                                                                                                                                                                                                                                                                                                                                                                                                                                                                                                                                                                                                                                                                                                                                                                                                                                                                                                                                                                                                                                                                                                                                                                                                                                                                                                                                                                                                | 3 (0.8%)        | 0 (0.0%)        | 0 (0.0%)                                     |                          | 3 (0.2%)                        |
| Unlikely                                                                                                                                                                                                                                                                                                                                                                                                                                                                                                                                                                                                                                                                                                                                                                                                                                                                                                                                                                                                                                                                                                                                                                                                                                                                                                                                                                                                | 2 (0.5%)        | 0 (0.0%)        | 0 (0.0%)                                     |                          | 2 (0.2%)                        |
| Unrelated                                                                                                                                                                                                                                                                                                                                                                                                                                                                                                                                                                                                                                                                                                                                                                                                                                                                                                                                                                                                                                                                                                                                                                                                                                                                                                                                                                                               | 1 (0.3%)        | 0 (0.0%)        | 1 (0.2%)                                     |                          | 2 (0.2%)                        |
| <p>Key- AE- Adverse event; CPAP- Continuous Positive Airway Pressure; HFNO- High-flow nasal oxygen; SAE- Serious adverse event<br/> a- p-value calculated using chi-square test for AE/SAE and AE comparison, and using Fisher-exact for SAE comparison<br/> b-Multiple events/categories allowed per participants<br/> c-Details of other events:<br/> Conventional oxygen therapy (one event): Nasal cannulae leak<br/> CPAP (five events): Chest tightness; Significant desaturation when eating; CPAP leak; Pneumopericardium; Low tidal volume/hypoxia/dyspnoea (one of each event)<br/> HFNO (eight events): Abdominal distension; Bilateral rupture of tympanic membrane; Monoclonal antibody treatment side-effect (hand pustules); Need for tracheostomy; Ventilator-associated pneumonia and klebsiella meningitis diagnosis; Pleural effusions; Secondary sepsis, intracranial bleed, requirement for renal replacement therapy; Detail not reported (one of each event)<br/> d-Details of serious adverse events:<br/> Conventional oxygen therapy (one event): Pulmonary embolus<br/> CPAP (seven events): Type 2 myocardial infarction (one event); surgical emphysema and pneumomediastinum (one event); vomiting requiring emergency tracheal intubation (one event); Intracranial bleed (one event); Perforated bowel (one event); Pneumothorax and pneumomediastinum (two events)</p> |                 |                 |                                              |                          |                                 |
