# Supplementary material
Source: PubMed Central journal article supplement (PMC8787685)
Supplement: jama-e220028-s003.pdf [file jama-e220028-s003.pdf]

\*Indicates required information. Only first name, last name, and suffix will appear in PubMed.

| <b>*Group Name(s): Recovery-RS collaborators</b> |               |                       |                  |                                                                                  |                                          |                                                         |                                                                                            |
|--------------------------------------------------|---------------|-----------------------|------------------|----------------------------------------------------------------------------------|------------------------------------------|---------------------------------------------------------|--------------------------------------------------------------------------------------------|
| *First Name and Middle Initial(s)                | *Last Name    | *Suffix (eg, Jr, III) | Academic Degrees | Institution                                                                      | Location (city, state/province, country) | Role or Contribution, eg, chair, principal investigator | Group (if more than 1 Group listed in the byline) and/or Subgroup (eg, Steering Committee) |
| Nick                                             | Duffy         |                       |                  | Aintree University Hospital, Liverpool University Hospitals NHS Foundation Trust | Liverpool, UK                            |                                                         |                                                                                            |
| Martin                                           | Kelly         |                       |                  | Altnagelvin Area Hospital, Western Health and Social Care Trust                  | Londonderry, UK                          |                                                         |                                                                                            |
| Donal                                            | Concannon     |                       |                  | Altnagelvin Area Hospital, Western Health and Social Care Trust                  | Londonderry, UK                          |                                                         |                                                                                            |
| Kathryn                                          | Ferguson      |                       |                  | Altnagelvin Area Hospital, Western Health and Social Care Trust                  | Londonderry, UK                          |                                                         |                                                                                            |
| Declan                                           | McClintock    |                       |                  | Altnagelvin Area Hospital, Western Health and Social Care Trust                  | Londonderry, UK                          |                                                         |                                                                                            |
| Rajeev                                           | Jha           |                       |                  | Barnet Hospital, Royal Free London NHS Foundation Trust                          | London, UK                               |                                                         |                                                                                            |
| Vinodh                                           | Krishnamurthy |                       |                  | Barnet Hospital, Royal Free London NHS Foundation Trust                          | London, UK                               |                                                         |                                                                                            |
| Stephen                                          | O'Farrell     |                       |                  | Barnet Hospital, Royal Free London NHS Foundation Trust                          | London, UK                               |                                                         |                                                                                            |
| Cecilia                                          | O'Kane        |                       |                  | Belfast City Hospital, Belfast Health and Social Care Trust                      | Belfast, UK                              |                                                         |                                                                                            |
| Clare                                            | Ross          |                       |                  | Charing Cross Hospital, Imperial College Healthcare NHS Trust                    | London, UK                               |                                                         |                                                                                            |
| Richard D                                        | Turner        |                       |                  | Charing Cross Hospital, Imperial College Healthcare NHS Trust                    | London, UK                               |                                                         |                                                                                            |
| Serge                                            | Miodragovic   |                       |                  | Charing Cross Hospital, Imperial College Healthcare NHS Trust                    | London, UK                               |                                                         |                                                                                            |
| Peter                                            | Hawkins       |                       |                  | Colchester General Hospital, East Suffolk and North Essex NHS Foundation Trust   | Colchester, UK                           |                                                         |                                                                                            |
| Jessie                                           | Welbourne     |                       |                  | Derriford Hospital, University Hospitals Plymouth NHS Trust                      | Plymouth, UK                             |                                                         |                                                                                            |
| Colin                                            | Wells         |                       |                  | Derriford Hospital, University Hospitals Plymouth NHS Trust                      | Plymouth, UK                             |                                                         |                                                                                            |
| Liana                                            | Lankester     |                       |                  | Derriford Hospital, University Hospitals Plymouth NHS Trust                      | Plymouth, UK                             |                                                         |                                                                                            |
| Samuel D                                         | Waddy         |                       |                  | Derriford Hospital, University Hospitals Plymouth NHS Trust                      | Plymouth, UK                             |                                                         |                                                                                            |
| Julian                                           | Lentaigne     |                       |                  | Derriford Hospital, University Hospitals Plymouth NHS Trust                      | Plymouth, UK                             |                                                         |                                                                                            |
| Jay                                              | Nesbitt       |                       |                  | Fairfield General Hospital, Northern Care Alliance NHS Group                     | Manchester, UK                           |                                                         |                                                                                            |
| Sarah                                            | Clarke        |                       |                  | Fairfield General Hospital, Northern Care Alliance NHS Group                     | Manchester, UK                           |                                                         |                                                                                            |
| Catherine                                        | Houghton      |                       |                  | Fairfield General Hospital, Northern Care Alliance NHS Group                     | Manchester, UK                           |                                                         |                                                                                            |
| Devaki                                           | O'Riordan     |                       |                  | Fairfield General Hospital, Northern Care Alliance NHS Group                     | Manchester, UK                           |                                                         |                                                                                            |
| Kate                                             | Shepherd      |                       |                  | Fairfield General Hospital, Northern Care Alliance NHS Group                     | Manchester, UK                           |                                                         |                                                                                            |
| Beth                                             | Turnpenny     |                       |                  | Fairfield General Hospital, Northern Care Alliance NHS Group                     | Manchester, UK                           |                                                         |                                                                                            |
| Rosane                                           | Joseph        |                       |                  | Fairfield General Hospital, Northern Care Alliance NHS Group                     | Manchester, UK                           |                                                         |                                                                                            |
| Michael                                          | Steiner       |                       |                  | Glenfield Hospital, University Hospitals of Leicester NHS Foundation Trust       | Leicester, UK                            |                                                         |                                                                                            |
| Clare                                            | Rossall       |                       |                  | Glenfield Hospital, University Hospitals of Leicester NHS Foundation Trust       | Leicester, UK                            |                                                         |                                                                                            |
| Rachel                                           | Mundin        |                       |                  | Glenfield Hospital, University Hospitals of Leicester NHS Foundation Trust       | Leicester, UK                            |                                                         |                                                                                            |
| Samuele                                          | Boschi        |                       |                  | Glenfield Hospital, University Hospitals of Leicester NHS Foundation Trust       | Leicester, UK                            |                                                         |                                                                                            |
| Hamish J C                                       | McAuley       |                       |                  | Glenfield Hospital, University Hospitals of Leicester NHS Foundation Trust       | Leicester, UK                            |                                                         |                                                                                            |
| Richard J                                        | Russell       |                       |                  | Glenfield Hospital, University Hospitals of Leicester NHS Foundation Trust       | Leicester, UK                            |                                                         |                                                                                            |
| Sarah                                            | Diver         |                       |                  | Glenfield Hospital, University Hospitals of Leicester NHS Foundation Trust       | Leicester, UK                            |                                                         |                                                                                            |
| Omer                                             | Elneima       |                       |                  | Glenfield Hospital, University Hospitals of Leicester NHS Foundation Trust       | Leicester, UK                            |                                                         |                                                                                            |
| Wadah                                            | Ibrahim       |                       |                  | Glenfield Hospital, University Hospitals of Leicester NHS Foundation Trust       | Leicester, UK                            |                                                         |                                                                                            |
| Ahmed                                            | Yousuf        |                       |                  | Glenfield Hospital, University Hospitals of Leicester NHS Foundation Trust       | Leicester, UK                            |                                                         |                                                                                            |
| Sarah                                            | Edwards       |                       |                  | Glenfield Hospital, University Hospitals of Leicester NHS Foundation Trust       | Leicester, UK                            |                                                         |                                                                                            |
| Mohammad                                         | Saim          |                       |                  | Good Hope Hospital, University Hospitals Birmingham NHS Foundation Trust         | Birmingham, UK                           |                                                         |                                                                                            |
| Bridget                                          | Hopkins       |                       |                  | Good Hope Hospital, University Hospitals Birmingham NHS Foundation Trust         | Birmingham, UK                           |                                                         |                                                                                            |
| Lisa                                             | Kelly         |                       |                  | Good Hope Hospital, University Hospitals Birmingham NHS Foundation Trust         | Birmingham, UK                           |                                                         |                                                                                            |
| Daniel                                           | Lenton        |                       |                  | Good Hope Hospital, University Hospitals Birmingham NHS Foundation Trust         | Birmingham, UK                           |                                                         |                                                                                            |
| Helen                                            | Shackelford   |                       |                  | Good Hope Hospital, University Hospitals Birmingham NHS Foundation Trust         | Birmingham, UK                           |                                                         |                                                                                            |
| Laura                                            | Thrasyvoulou  |                       |                  | Good Hope Hospital, University Hospitals Birmingham NHS Foundation Trust         | Birmingham, UK                           |                                                         |                                                                                            |
| Heather                                          | Willis        |                       |                  | Good Hope Hospital, University Hospitals Birmingham NHS Foundation Trust         | Birmingham, UK                           |                                                         |                                                                                            |
| Sara                                             | Fairbairn     |                       |                  | Grange University Hospital, Aneurin Bevan University Health Board                | Cwmbran, UK                              |                                                         |                                                                                            |
| Chris                                            | Green         |                       |                  | Heartlands Hospital, University Hospitals Birmingham NHS Foundation Trust        | Birmingham, UK                           |                                                         |                                                                                            |
| Mamta                                            | Patel         |                       |                  | Heartlands Hospital, University Hospitals Birmingham NHS Foundation Trust        | Birmingham, UK                           |                                                         |                                                                                            |
| Lucie                                            | Linhartova    |                       |                  | Heartlands Hospital, University Hospitals Birmingham NHS Foundation Trust        | Birmingham, UK                           |                                                         |                                                                                            |

\*Indicates required information. Only first name, last name, and suffix will appear in PubMed.

| *First Name and Middle Initial(s) | *Last Name        | *Suffix (eg, Jr, III) | Academic Degrees | Institution                                                                            | Location (city, state/province, country) | Role or Contribution, eg, chair, principal investigator | Group (if more than 1 Group listed in the byline) and/or Subgroup (eg, Steering Committee) |
|-----------------------------------|-------------------|-----------------------|------------------|----------------------------------------------------------------------------------------|------------------------------------------|---------------------------------------------------------|--------------------------------------------------------------------------------------------|
| Emma                              | Hayton            |                       |                  | Heartlands Hospital, University Hospitals Birmingham NHS Foundation Trust              | Birmingham, UK                           |                                                         |                                                                                            |
| Amy                               | Chue              |                       |                  | Heartlands Hospital, University Hospitals Birmingham NHS Foundation Trust              | Birmingham, UK                           |                                                         |                                                                                            |
| Ben                               | Collins           |                       |                  | Heartlands Hospital, University Hospitals Birmingham NHS Foundation Trust              | Birmingham, UK                           |                                                         |                                                                                            |
| Matt                              | Page              |                       |                  | Heartlands Hospital, University Hospitals Birmingham NHS Foundation Trust              | Birmingham, UK                           |                                                         |                                                                                            |
| Ed                                | Birkhamshaw       |                       |                  | Heartlands Hospital, University Hospitals Birmingham NHS Foundation Trust              | Birmingham, UK                           |                                                         |                                                                                            |
| Mary                              | Bellamy           |                       |                  | Heartlands Hospital, University Hospitals Birmingham NHS Foundation Trust              | Birmingham, UK                           |                                                         |                                                                                            |
| Heather                           | Willis            |                       |                  | Heartlands Hospital, University Hospitals Birmingham NHS Foundation Trust              | Birmingham, UK                           |                                                         |                                                                                            |
| Bridget                           | Hopkins           |                       |                  | Heartlands Hospital, University Hospitals Birmingham NHS Foundation Trust              | Birmingham, UK                           |                                                         |                                                                                            |
| Hollie                            | Bancroft          |                       |                  | Heartlands Hospital, University Hospitals Birmingham NHS Foundation Trust              | Birmingham, UK                           |                                                         |                                                                                            |
| Emma                              | Gallagher         |                       |                  | Heartlands Hospital, University Hospitals Birmingham NHS Foundation Trust              | Birmingham, UK                           |                                                         |                                                                                            |
| Pearlene                          | Antoine-Pitterson |                       |                  | Heartlands Hospital, University Hospitals Birmingham NHS Foundation Trust              | Birmingham, UK                           |                                                         |                                                                                            |
| Beth                              | Jones             |                       |                  | Heartlands Hospital, University Hospitals Birmingham NHS Foundation Trust              | Birmingham, UK                           |                                                         |                                                                                            |
| Safia                             | Begum             |                       |                  | Heartlands Hospital, University Hospitals Birmingham NHS Foundation Trust              | Birmingham, UK                           |                                                         |                                                                                            |
| Sundip                            | Dhani             |                       |                  | Heartlands Hospital, University Hospitals Birmingham NHS Foundation Trust              | Birmingham, UK                           |                                                         |                                                                                            |
| Daniel                            | Lenton            |                       |                  | Heartlands Hospital, University Hospitals Birmingham NHS Foundation Trust              | Birmingham, UK                           |                                                         |                                                                                            |
| Michael                           | Crooks            |                       |                  | Hull Royal Infirmary, Hull University Teaching Hospitals NHS Trust                     | Hull, UK                                 |                                                         |                                                                                            |
| Kayleigh                          | Brindle           |                       |                  | Hull Royal Infirmary, Hull University Teaching Hospitals NHS Trust                     | Hull, UK                                 |                                                         |                                                                                            |
| Shoaib                            | Faruqi            |                       |                  | Hull Royal Infirmary, Hull University Teaching Hospitals NHS Trust                     | Hull, UK                                 |                                                         |                                                                                            |
| Rachel                            | Flockton          |                       |                  | Hull Royal Infirmary, Hull University Teaching Hospitals NHS Trust                     | Hull, UK                                 |                                                         |                                                                                            |
| Emma                              | Pinder            |                       |                  | Hull Royal Infirmary, Hull University Teaching Hospitals NHS Trust                     | Hull, UK                                 |                                                         |                                                                                            |
| Susannah                          | Thackray-Nocera   |                       |                  | Hull Royal Infirmary, Hull University Teaching Hospitals NHS Trust                     | Hull, UK                                 |                                                         |                                                                                            |
| Keji                              | Dalemo            |                       |                  | Intensive Care National Audit and Research Centre                                      | London, UK                               |                                                         |                                                                                            |
| James                             | Doidge            |                       |                  | Intensive Care National Audit and Research Centre                                      | London, UK                               |                                                         |                                                                                            |
| Julia                             | Edwards           |                       |                  | Intensive Care National Audit and Research Centre                                      | London, UK                               |                                                         |                                                                                            |
| Jonathon                          | Douse             |                       |                  | Ipswich Hospital, East Suffolk and North Essex NHS Foundation Trust                    | Ipswich, UK                              |                                                         |                                                                                            |
| Stephanie                         | Bell              |                       |                  | Ipswich Hospital, East Suffolk and North Essex NHS Foundation Trust                    | Ipswich, UK                              |                                                         |                                                                                            |
| Bally                             | Purewal           |                       |                  | Ipswich Hospital, East Suffolk and North Essex NHS Foundation Trust                    | Ipswich, UK                              |                                                         |                                                                                            |
| Cathleen                          | Chabo             |                       |                  | Ipswich Hospital, East Suffolk and North Essex NHS Foundation Trust                    | Ipswich, UK                              |                                                         |                                                                                            |
| Carol                             | Buckman           |                       |                  | Ipswich Hospital, East Suffolk and North Essex NHS Foundation Trust                    | Ipswich, UK                              |                                                         |                                                                                            |
| Deborah                           | Beeby             |                       |                  | Ipswich Hospital, East Suffolk and North Essex NHS Foundation Trust                    | Ipswich, UK                              |                                                         |                                                                                            |
| Georgina                          | Gray              |                       |                  | Ipswich Hospital, East Suffolk and North Essex NHS Foundation Trust                    | Ipswich, UK                              |                                                         |                                                                                            |
| Rebecca                           | Francis           |                       |                  | Ipswich Hospital, East Suffolk and North Essex NHS Foundation Trust                    | Ipswich, UK                              |                                                         |                                                                                            |
| Vanessa                           | Rivers            |                       |                  | Ipswich Hospital, East Suffolk and North Essex NHS Foundation Trust                    | Ipswich, UK                              |                                                         |                                                                                            |
| Matthew                           | Burton            |                       |                  | Ipswich Hospital, East Suffolk and North Essex NHS Foundation Trust                    | Ipswich, UK                              |                                                         |                                                                                            |
| Nicholas                          | Innes             |                       |                  | Ipswich Hospital, East Suffolk and North Essex NHS Foundation Trust                    | Ipswich, UK                              |                                                         |                                                                                            |
| Sandy                             | Ghattas           |                       |                  | Ipswich Hospital, East Suffolk and North Essex NHS Foundation Trust                    | Ipswich, UK                              |                                                         |                                                                                            |
| Rana                              | Rabbani           |                       |                  | Ipswich Hospital, East Suffolk and North Essex NHS Foundation Trust                    | Ipswich, UK                              |                                                         |                                                                                            |
| Venkat                            | Mahadevan         |                       |                  | James Paget University Hospital, James Paget University Hospitals NHS Foundation Trust | Great Yarmouth, UK                       |                                                         |                                                                                            |
| Venkateswaran                     | Mahadevan         |                       |                  | James Paget University Hospital, James Paget University Hospitals NHS Foundation Trust | Great Yarmouth, UK                       |                                                         |                                                                                            |
| Alastair                          | Green             |                       |                  | James Paget University Hospital, James Paget University Hospitals NHS Foundation Trust | Great Yarmouth, UK                       |                                                         |                                                                                            |
| Ben                               | Burton            |                       |                  | James Paget University Hospital, James Paget University Hospitals NHS Foundation Trust | Great Yarmouth, UK                       |                                                         |                                                                                            |
| Christian                         | Hacon             |                       |                  | James Paget University Hospital, James Paget University Hospitals NHS Foundation Trust | Great Yarmouth, UK                       |                                                         |                                                                                            |
| Elva                              | Wilhelmsen        |                       |                  | James Paget University Hospital, James Paget University Hospitals NHS Foundation Trust | Great Yarmouth, UK                       |                                                         |                                                                                            |
| Paul R                            | Hughes            |                       |                  | Jersey General Hospital, St Helier                                                     | Jersey                                   |                                                         |                                                                                            |
| Kai                               | Lee               |                       |                  | King's College Hospital, King's College Hospital NHS Foundation Trust                  | London, UK                               |                                                         |                                                                                            |
| Richard                           | Lowsby            |                       |                  | Leighton Hospital, Mid Cheshire Hospitals NHS Foundation Trust                         | Crewe, UK                                |                                                         |                                                                                            |
| Laurence                          | Baker             |                       |                  | Leighton Hospital, Mid Cheshire Hospitals NHS Foundation Trust                         | Crewe, UK                                |                                                         |                                                                                            |

\*Indicates required information. Only first name, last name, and suffix will appear in PubMed.

| *First Name and Middle Initial(s) | *Last Name  | *Suffix (eg, Jr, III) | Academic Degrees | Institution                                                                                            | Location (city, state/province, country) | Role or Contribution, eg, chair, principal investigator | Group (if more than 1 Group listed in the byline) and/or Subgroup (eg, Steering Committee) |
|-----------------------------------|-------------|-----------------------|------------------|--------------------------------------------------------------------------------------------------------|------------------------------------------|---------------------------------------------------------|--------------------------------------------------------------------------------------------|
| Perry                             | Board       |                       |                  | Leighton Hospital, Mid Cheshire Hospitals NHS Foundation Trust                                         | Crewe, UK                                |                                                         |                                                                                            |
| Varun                             | Chauhan     |                       |                  | Leighton Hospital, Mid Cheshire Hospitals NHS Foundation Trust                                         | Crewe, UK                                |                                                         |                                                                                            |
| Sheron                            | Clarke      |                       |                  | Leighton Hospital, Mid Cheshire Hospitals NHS Foundation Trust                                         | Crewe, UK                                |                                                         |                                                                                            |
| Duncan                            | Fullerton   |                       |                  | Leighton Hospital, Mid Cheshire Hospitals NHS Foundation Trust                                         | Crewe, UK                                |                                                         |                                                                                            |
| Claire                            | Gabriel     |                       |                  | Leighton Hospital, Mid Cheshire Hospitals NHS Foundation Trust                                         | Crewe, UK                                |                                                         |                                                                                            |
| Tom                               | Houston     |                       |                  | Leighton Hospital, Mid Cheshire Hospitals NHS Foundation Trust                                         | Crewe, UK                                |                                                         |                                                                                            |
| Diana                             | Lees        |                       |                  | Leighton Hospital, Mid Cheshire Hospitals NHS Foundation Trust                                         | Crewe, UK                                |                                                         |                                                                                            |
| Robert                            | Normanton   |                       |                  | Leighton Hospital, Mid Cheshire Hospitals NHS Foundation Trust                                         | Crewe, UK                                |                                                         |                                                                                            |
| Katherine                         | Pagett      |                       |                  | Leighton Hospital, Mid Cheshire Hospitals NHS Foundation Trust                                         | Crewe, UK                                |                                                         |                                                                                            |
| Sarah                             | Thornley    |                       |                  | Leighton Hospital, Mid Cheshire Hospitals NHS Foundation Trust                                         | Crewe, UK                                |                                                         |                                                                                            |
| Harriet                           | Wright      |                       |                  | Leighton Hospital, Mid Cheshire Hospitals NHS Foundation Trust                                         | Crewe, UK                                |                                                         |                                                                                            |
| Alison                            | McMillan    |                       |                  | Lister Hospital, East and North Hertfordshire NHS Trust                                                | Stevenage, UK                            |                                                         |                                                                                            |
| Marta                             | Babores     |                       |                  | Macclesfield District General Hospital, East Cheshire NHS Trust                                        | Macclesfield, UK                         |                                                         |                                                                                            |
| Xiang                             | Lee         |                       |                  | Macclesfield District General Hospital, East Cheshire NHS Trust                                        | Macclesfield, UK                         |                                                         |                                                                                            |
| Thapas                            | Nagarajan   |                       |                  | Macclesfield District General Hospital, East Cheshire NHS Trust                                        | Macclesfield, UK                         |                                                         |                                                                                            |
| Maureen                           | Holland     |                       |                  | Macclesfield District General Hospital, East Cheshire NHS Trust                                        | Macclesfield, UK                         |                                                         |                                                                                            |
| Thomas                            | Sanctuary   |                       |                  | Medway Maritime Hospital, Medway NHS Foundation Trust                                                  | Gillingham, UK                           |                                                         |                                                                                            |
| Richard                           | Innes       |                       |                  | Musgrove Park Hospital, Somerset NHS Foundation Trust                                                  | Taunton, UK                              |                                                         |                                                                                            |
| Simon                             | Fletcher    |                       |                  | Norfolk and Norwich University Hospital, Norfolk and Norwich University Hospitals NHS Foundation Trust | Norwich, UK                              |                                                         |                                                                                            |
| Nita                              | Sehgal      |                       |                  | North Manchester General Hospital, Northern Care Alliance NHS Group                                    | Manchester, UK                           |                                                         |                                                                                            |
| Tracy                             | Duncan      |                       |                  | North Manchester General Hospital, Northern Care Alliance NHS Group                                    | Manchester, UK                           |                                                         |                                                                                            |
| Justine                           | Pooley      |                       |                  | Office for National Statistics                                                                         | Newport, UK                              |                                                         |                                                                                            |
| Emma                              | Watkins     |                       |                  | Princess of Wales Hospital (Wales), Cwm Taf Morgannwg University Health Board                          | Bridgend, UK                             |                                                         |                                                                                            |
| Harmesh                           | Moudgil     |                       |                  | Princess Royal Hospital, Shrewsbury and Telford Hospital NHS Trust                                     | Telford, UK                              |                                                         |                                                                                            |
| Mandy                             | Carnahan    |                       |                  | Princess Royal Hospital, Shrewsbury and Telford Hospital NHS Trust                                     | Telford, UK                              |                                                         |                                                                                            |
| Denise                            | Donaldson   |                       |                  | Princess Royal Hospital, Shrewsbury and Telford Hospital NHS Trust                                     | Telford, UK                              |                                                         |                                                                                            |
| Deepak                            | Rao         |                       |                  | Princess Royal University Hospital, King's College Hospital NHS Foundation Trust                       | Orpington, UK                            |                                                         |                                                                                            |
| Chia L                            | Tey         |                       |                  | Princess Royal University Hospital, King's College Hospital NHS Foundation Trust                       | Orpington, UK                            |                                                         |                                                                                            |
| Lynette                           | Linkson     |                       |                  | Princess Royal University Hospital, King's College Hospital NHS Foundation Trust                       | Orpington, UK                            |                                                         |                                                                                            |
| Tom                               | Buttle      |                       |                  | Princess Royal University Hospital, King's College Hospital NHS Foundation Trust                       | Orpington, UK                            |                                                         |                                                                                            |
| Jennifer                          | Vidler      |                       |                  | Princess Royal University Hospital, King's College Hospital NHS Foundation Trust                       | Orpington, UK                            |                                                         |                                                                                            |
| Nicola                            | Griffiths   |                       |                  | Princess Royal University Hospital, King's College Hospital NHS Foundation Trust                       | Orpington, UK                            |                                                         |                                                                                            |
| Alexander                         | Hicks       |                       |                  | Queen Alexandra Hospital, Portsmouth Hospitals University NHS Trust                                    | Portsmouth, UK                           |                                                         |                                                                                            |
| Hitasha                           | Rupani      |                       |                  | Queen Alexandra Hospital, Portsmouth Hospitals University NHS Trust                                    | Portsmouth, UK                           |                                                         |                                                                                            |
| Afaq                              | Alfridi     |                       |                  | Queen Alexandra Hospital, Portsmouth Hospitals University NHS Trust                                    | Portsmouth, UK                           |                                                         |                                                                                            |
| Debi                              | Barns       |                       |                  | Queen Alexandra Hospital, Portsmouth Hospitals University NHS Trust                                    | Portsmouth, UK                           |                                                         |                                                                                            |
| Elena                             | Cowan       |                       |                  | Queen Alexandra Hospital, Portsmouth Hospitals University NHS Trust                                    | Portsmouth, UK                           |                                                         |                                                                                            |
| Mini                              | David       |                       |                  | Queen Alexandra Hospital, Portsmouth Hospitals University NHS Trust                                    | Portsmouth, UK                           |                                                         |                                                                                            |
| Alex                              | Darbyshire  |                       |                  | Queen Alexandra Hospital, Portsmouth Hospitals University NHS Trust                                    | Portsmouth, UK                           |                                                         |                                                                                            |
| Ben                               | Giles       |                       |                  | Queen Alexandra Hospital, Portsmouth Hospitals University NHS Trust                                    | Portsmouth, UK                           |                                                         |                                                                                            |
| Claire                            | Roberts     |                       |                  | Queen Alexandra Hospital, Portsmouth Hospitals University NHS Trust                                    | Portsmouth, UK                           |                                                         |                                                                                            |
| Claudia                           | Lameirinhas |                       |                  | Queen Alexandra Hospital, Portsmouth Hospitals University NHS Trust                                    | Portsmouth, UK                           |                                                         |                                                                                            |
| Daniel                            | Neville     |                       |                  | Queen Alexandra Hospital, Portsmouth Hospitals University NHS Trust                                    | Portsmouth, UK                           |                                                         |                                                                                            |
| Ejaz                              | Hossain     |                       |                  | Queen Alexandra Hospital, Portsmouth Hospitals University NHS Trust                                    | Portsmouth, UK                           |                                                         |                                                                                            |
| Fiona                             | Thompson    |                       |                  | Queen Alexandra Hospital, Portsmouth Hospitals University NHS Trust                                    | Portsmouth, UK                           |                                                         |                                                                                            |
| Helena                            | Edwards     |                       |                  | Queen Alexandra Hospital, Portsmouth Hospitals University NHS Trust                                    | Portsmouth, UK                           |                                                         |                                                                                            |
| Jen                               | Naftel      |                       |                  | Queen Alexandra Hospital, Portsmouth Hospitals University NHS Trust                                    | Portsmouth, UK                           |                                                         |                                                                                            |
| Jonathan                          | Winter      |                       |                  | Queen Alexandra Hospital, Portsmouth Hospitals University NHS Trust                                    | Portsmouth, UK                           |                                                         |                                                                                            |

\*Indicates required information. Only first name, last name, and suffix will appear in PubMed.

| *First Name and Middle Initial(s) | *Last Name   | *Suffix (eg, Jr, III) | Academic Degrees | Institution                                                                    | Location (city, state/province, country) | Role or Contribution, eg, chair, principal investigator | Group (if more than 1 Group listed in the byline) and/or Subgroup (eg, Steering Committee) |
|-----------------------------------|--------------|-----------------------|------------------|--------------------------------------------------------------------------------|------------------------------------------|---------------------------------------------------------|--------------------------------------------------------------------------------------------|
| Kate                              | Burrows      |                       |                  | Queen Alexandra Hospital, Portsmouth Hospitals University NHS Trust            | Portsmouth, UK                           |                                                         |                                                                                            |
| Laura                             | Wiffen       |                       |                  | Queen Alexandra Hospital, Portsmouth Hospitals University NHS Trust            | Portsmouth, UK                           |                                                         |                                                                                            |
| Lauren                            | Fox          |                       |                  | Queen Alexandra Hospital, Portsmouth Hospitals University NHS Trust            | Portsmouth, UK                           |                                                         |                                                                                            |
| Lisa                              | Murray       |                       |                  | Queen Alexandra Hospital, Portsmouth Hospitals University NHS Trust            | Portsmouth, UK                           |                                                         |                                                                                            |
| Liz                               | Hawes        |                       |                  | Queen Alexandra Hospital, Portsmouth Hospitals University NHS Trust            | Portsmouth, UK                           |                                                         |                                                                                            |
| Madhu                             | Mamman       |                       |                  | Queen Alexandra Hospital, Portsmouth Hospitals University NHS Trust            | Portsmouth, UK                           |                                                         |                                                                                            |
| Maria                             | Moon         |                       |                  | Queen Alexandra Hospital, Portsmouth Hospitals University NHS Trust            | Portsmouth, UK                           |                                                         |                                                                                            |
| Marie                             | White        |                       |                  | Queen Alexandra Hospital, Portsmouth Hospitals University NHS Trust            | Portsmouth, UK                           |                                                         |                                                                                            |
| Megan                             | Rowley       |                       |                  | Queen Alexandra Hospital, Portsmouth Hospitals University NHS Trust            | Portsmouth, UK                           |                                                         |                                                                                            |
| Nina                              | Szarazova    |                       |                  | Queen Alexandra Hospital, Portsmouth Hospitals University NHS Trust            | Portsmouth, UK                           |                                                         |                                                                                            |
| Sally                             | Gosling      |                       |                  | Queen Alexandra Hospital, Portsmouth Hospitals University NHS Trust            | Portsmouth, UK                           |                                                         |                                                                                            |
| Simon                             | Cooper       |                       |                  | Queen Alexandra Hospital, Portsmouth Hospitals University NHS Trust            | Portsmouth, UK                           |                                                         |                                                                                            |
| Sonia                             | Baryschpolec |                       |                  | Queen Alexandra Hospital, Portsmouth Hospitals University NHS Trust            | Portsmouth, UK                           |                                                         |                                                                                            |
| Sophie                            | Arndtz       |                       |                  | Queen Alexandra Hospital, Portsmouth Hospitals University NHS Trust            | Portsmouth, UK                           |                                                         |                                                                                            |
| Yasmin                            | H-Davies     |                       |                  | Queen Alexandra Hospital, Portsmouth Hospitals University NHS Trust            | Portsmouth, UK                           |                                                         |                                                                                            |
| Yazeed Abed                       | El Khaleq    |                       |                  | Queen Alexandra Hospital, Portsmouth Hospitals University NHS Trust            | Portsmouth, UK                           |                                                         |                                                                                            |
| Zoe                               | Garner       |                       |                  | Queen Alexandra Hospital, Portsmouth Hospitals University NHS Trust            | Portsmouth, UK                           |                                                         |                                                                                            |
| Siyamini                          | Vythilingam  |                       |                  | Queen Alexandra Hospital, Portsmouth Hospitals University NHS Trust            | Portsmouth, UK                           |                                                         |                                                                                            |
| Yingjia                           | Yang         |                       |                  | Queen Alexandra Hospital, Portsmouth Hospitals University NHS Trust            | Portsmouth, UK                           |                                                         |                                                                                            |
| Dhruv                             | Parekh       |                       |                  | Queen Elizabeth Hospital, University Hospitals Birmingham NHS Foundation Trust | Birmingham, UK                           |                                                         |                                                                                            |
| Shyam                             | Madathil     |                       |                  | Queen Elizabeth Hospital, University Hospitals Birmingham NHS Foundation Trust | Birmingham, UK                           |                                                         |                                                                                            |
| Jaimin                            | Patel        |                       |                  | Queen Elizabeth Hospital, University Hospitals Birmingham NHS Foundation Trust | Birmingham, UK                           |                                                         |                                                                                            |
| Colin                             | Bergin       |                       |                  | Queen Elizabeth Hospital, University Hospitals Birmingham NHS Foundation Trust | Birmingham, UK                           |                                                         |                                                                                            |
| Michelle                          | Bates        |                       |                  | Queen Elizabeth Hospital, University Hospitals Birmingham NHS Foundation Trust | Birmingham, UK                           |                                                         |                                                                                            |
| Christopher                       | McGhee       |                       |                  | Queen Elizabeth Hospital, University Hospitals Birmingham NHS Foundation Trust | Birmingham, UK                           |                                                         |                                                                                            |
| Daniella                          | Lynch        |                       |                  | Queen Elizabeth Hospital, University Hospitals Birmingham NHS Foundation Trust | Birmingham, UK                           |                                                         |                                                                                            |
| Khushpreet                        | Bhandal      |                       |                  | Queen Elizabeth Hospital, University Hospitals Birmingham NHS Foundation Trust | Birmingham, UK                           |                                                         |                                                                                            |
| Kyriaki                           | Tsakiridou   |                       |                  | Queen Elizabeth Hospital, University Hospitals Birmingham NHS Foundation Trust | Birmingham, UK                           |                                                         |                                                                                            |
| Amy                               | Bamford      |                       |                  | Queen Elizabeth Hospital, University Hospitals Birmingham NHS Foundation Trust | Birmingham, UK                           |                                                         |                                                                                            |
| Lauren                            | Cooper       |                       |                  | Queen Elizabeth Hospital, University Hospitals Birmingham NHS Foundation Trust | Birmingham, UK                           |                                                         |                                                                                            |
| Tony                              | Whitehouse   |                       |                  | Queen Elizabeth Hospital, University Hospitals Birmingham NHS Foundation Trust | Birmingham, UK                           |                                                         |                                                                                            |
| Tonny                             | Veenith      |                       |                  | Queen Elizabeth Hospital, University Hospitals Birmingham NHS Foundation Trust | Birmingham, UK                           |                                                         |                                                                                            |
| Elliott                           | Forster      |                       |                  | Queen Elizabeth Hospital, University Hospitals Birmingham NHS Foundation Trust | Birmingham, UK                           |                                                         |                                                                                            |
| Steph                             | Lane         |                       |                  | Queen Elizabeth Hospital, University Hospitals Birmingham NHS Foundation Trust | Birmingham, UK                           |                                                         |                                                                                            |
| Nick                              | Adams        |                       |                  | Queen Elizabeth Hospital, University Hospitals Birmingham NHS Foundation Trust | Birmingham, UK                           |                                                         |                                                                                            |
| Sonia                             | MacDonald    |                       |                  | Queen Elizabeth Hospital, University Hospitals Birmingham NHS Foundation Trust | Birmingham, UK                           |                                                         |                                                                                            |
| Sana                              | Manan        |                       |                  | Queen Elizabeth Hospital, University Hospitals Birmingham NHS Foundation Trust | Birmingham, UK                           |                                                         |                                                                                            |
| Sebastian                         | Lugg         |                       |                  | Queen Elizabeth Hospital, University Hospitals Birmingham NHS Foundation Trust | Birmingham, UK                           |                                                         |                                                                                            |
| Peer A                            | Shah         |                       |                  | Queen Elizabeth Hospital, University Hospitals Birmingham NHS Foundation Trust | Birmingham, UK                           |                                                         |                                                                                            |
| Emily                             | McKerney     |                       |                  | Queen Elizabeth Hospital, University Hospitals Birmingham NHS Foundation Trust | Birmingham, UK                           |                                                         |                                                                                            |
| Louise                            | Crowley      |                       |                  | Queen Elizabeth Hospital, University Hospitals Birmingham NHS Foundation Trust | Birmingham, UK                           |                                                         |                                                                                            |
| Gulfam                            | Mussawar     |                       |                  | Queen Elizabeth Hospital, University Hospitals Birmingham NHS Foundation Trust | Birmingham, UK                           |                                                         |                                                                                            |
| Atena                             | Gogokhia     |                       |                  | Queen Elizabeth Hospital, University Hospitals Birmingham NHS Foundation Trust | Birmingham, UK                           |                                                         |                                                                                            |
| Simon                             | Gompertz     |                       |                  | Queen Elizabeth Hospital, University Hospitals Birmingham NHS Foundation Trust | Birmingham, UK                           |                                                         |                                                                                            |
| Catherine                         | Snelson      |                       |                  | Queen Elizabeth Hospital, University Hospitals Birmingham NHS Foundation Trust | Birmingham, UK                           |                                                         |                                                                                            |
| Tessa                             | Oelofse      |                       |                  | Queen Elizabeth Hospital, University Hospitals Birmingham NHS Foundation Trust | Birmingham, UK                           |                                                         |                                                                                            |
| Jeremy                            | Wilson       |                       |                  | Queen Elizabeth Hospital, University Hospitals Birmingham NHS Foundation Trust | Birmingham, UK                           |                                                         |                                                                                            |
| Mansoor                           | Bangash      |                       |                  | Queen Elizabeth Hospital, University Hospitals Birmingham NHS Foundation Trust | Birmingham, UK                           |                                                         |                                                                                            |

\*Indicates required information. Only first name, last name, and suffix will appear in PubMed.

| *First Name and Middle Initial(s) | *Last Name   | *Suffix (eg, Jr, III) | Academic Degrees | Institution                                                                                                         | Location (city, state/province, country) | Role or Contribution, eg, chair, principal investigator | Group (if more than 1 Group listed in the byline) and/or Subgroup (eg, Steering Committee) |
|-----------------------------------|--------------|-----------------------|------------------|---------------------------------------------------------------------------------------------------------------------|------------------------------------------|---------------------------------------------------------|--------------------------------------------------------------------------------------------|
| Syed S                            | Huq          |                       |                  | Queen Elizabeth Hospital, University Hospitals Birmingham NHS Foundation Trust                                      | Birmingham, UK                           |                                                         |                                                                                            |
| Farrukh                           | Rauf         |                       |                  | Queen Elizabeth Hospital, University Hospitals Birmingham NHS Foundation Trust                                      | Birmingham, UK                           |                                                         |                                                                                            |
| Davinder                          | Dosanjh      |                       |                  | Queen Elizabeth Hospital, University Hospitals Birmingham NHS Foundation Trust                                      | Birmingham, UK                           |                                                         |                                                                                            |
| Natasha                           | Salmon       |                       |                  | Queen Elizabeth Hospital, University Hospitals Birmingham NHS Foundation Trust                                      | Birmingham, UK                           |                                                         |                                                                                            |
| Joyce                             | Tengende     |                       |                  | Queen Elizabeth Hospital, University Hospitals Birmingham NHS Foundation Trust                                      | Birmingham, UK                           |                                                         |                                                                                            |
| Kay F                             | Senior       |                       |                  | Queen Elizabeth Hospital, University Hospitals Birmingham NHS Foundation Trust                                      | Birmingham, UK                           |                                                         |                                                                                            |
| Brendan                           | Cooper       |                       |                  | Queen Elizabeth Hospital, University Hospitals Birmingham NHS Foundation Trust                                      | Birmingham, UK                           |                                                         |                                                                                            |
| Benjamin                          | Sutton       |                       |                  | Queen Elizabeth Hospital, University Hospitals Birmingham NHS Foundation Trust                                      | Birmingham, UK                           |                                                         |                                                                                            |
| Ian                               | Woolhouse    |                       |                  | Queen Elizabeth Hospital, University Hospitals Birmingham NHS Foundation Trust                                      | Birmingham, UK                           |                                                         |                                                                                            |
| Anjali                            | Crawshaw     |                       |                  | Queen Elizabeth Hospital, University Hospitals Birmingham NHS Foundation Trust                                      | Birmingham, UK                           |                                                         |                                                                                            |
| Richard                           | Thompson     |                       |                  | Queen Elizabeth Hospital, University Hospitals Birmingham NHS Foundation Trust                                      | Birmingham, UK                           |                                                         |                                                                                            |
| Patricia                          | Glynn        |                       |                  | Queen Elizabeth Hospital, University Hospitals Birmingham NHS Foundation Trust                                      | Birmingham, UK                           |                                                         |                                                                                            |
| Jon                               | Naylor       |                       |                  | Queen Elizabeth Hospital, University Hospitals Birmingham NHS Foundation Trust                                      | Birmingham, UK                           |                                                         |                                                                                            |
| Joseph                            | Alderman     |                       |                  | Queen Elizabeth Hospital, University Hospitals Birmingham NHS Foundation Trust                                      | Birmingham, UK                           |                                                         |                                                                                            |
| Minesh                            | Chotalia     |                       |                  | Queen Elizabeth Hospital, University Hospitals Birmingham NHS Foundation Trust                                      | Birmingham, UK                           |                                                         |                                                                                            |
| Martin                            | Le Breuille  |                       |                  | Queen Elizabeth Hospital, University Hospitals Birmingham NHS Foundation Trust                                      | Birmingham, UK                           |                                                         |                                                                                            |
| Nicholas                          | Talbot       |                       |                  | Queen Elizabeth Hospital, University Hospitals Birmingham NHS Foundation Trust                                      | Birmingham, UK                           |                                                         |                                                                                            |
| Gregory                           | Packer       |                       |                  | Queen Elizabeth Hospital, University Hospitals Birmingham NHS Foundation Trust                                      | Birmingham, UK                           |                                                         |                                                                                            |
| Chris                             | Carlin       |                       |                  | Queen Elizabeth University Hospital (Glasgow), Greater Glasgow Health Board                                         | Glasgow, UK                              |                                                         |                                                                                            |
| Dan                               | Harvey       |                       |                  | Queen's Medical Centre, Nottingham University Hospitals NHS Trust                                                   | Nottingham, UK                           |                                                         |                                                                                            |
| Sara                              | Fairbairn    |                       |                  | Royal Gwent Hospital, Aneurin Bevan University Health Board                                                         | Newport, UK                              |                                                         |                                                                                            |
| Alasdair                          | Gray         |                       |                  | Royal Infirmary of Edinburgh, NHS Lothian,                                                                          | Edinburgh, UK.                           |                                                         |                                                                                            |
| Manish                            | Gautam       |                       |                  | Royal Liverpool University Hospital, Liverpool University Hospitals NHS Foundation Trust                            | Liverpool, UK                            |                                                         |                                                                                            |
| Ingeborg                          | Welters      |                       |                  | Royal Liverpool University Hospital, Liverpool University Hospitals NHS Foundation Trust                            | Liverpool, UK                            |                                                         |                                                                                            |
| David O                           | Hamilton     |                       |                  | Royal Liverpool University Hospital, Liverpool University Hospitals NHS Foundation Trust                            | Liverpool, UK                            |                                                         |                                                                                            |
| Hassan                            | Burhan       |                       |                  | Royal Liverpool University Hospital, Liverpool University Hospitals NHS Foundation Trust                            | Liverpool, UK                            |                                                         |                                                                                            |
| Karl                              | Hunter       |                       |                  | Royal Liverpool University Hospital, Liverpool University Hospitals NHS Foundation Trust                            | Liverpool, UK                            |                                                         |                                                                                            |
| Brian                             | Johnston     |                       |                  | Royal Liverpool University Hospital, Liverpool University Hospitals NHS Foundation Trust                            | Liverpool, UK                            |                                                         |                                                                                            |
| Maria                             | Lopez        |                       |                  | Royal Liverpool University Hospital, Liverpool University Hospitals NHS Foundation Trust                            | Liverpool, UK                            |                                                         |                                                                                            |
| Catherine                         | Lowe         |                       |                  | Royal Liverpool University Hospital, Liverpool University Hospitals NHS Foundation Trust                            | Liverpool, UK                            |                                                         |                                                                                            |
| Suleman                           | Mulla        |                       |                  | Royal Liverpool University Hospital, Liverpool University Hospitals NHS Foundation Trust                            | Liverpool, UK                            |                                                         |                                                                                            |
| Jaime F                           | Roman        |                       |                  | Royal Liverpool University Hospital, Liverpool University Hospitals NHS Foundation Trust                            | Liverpool, UK                            |                                                         |                                                                                            |
| David                             | Shaw         |                       |                  | Royal Liverpool University Hospital, Liverpool University Hospitals NHS Foundation Trust                            | Liverpool, UK                            |                                                         |                                                                                            |
| Alicia                            | Waite        |                       |                  | Royal Liverpool University Hospital, Liverpool University Hospitals NHS Foundation Trust                            | Liverpool, UK                            |                                                         |                                                                                            |
| Victoria                          | Waugh        |                       |                  | Royal Liverpool University Hospital, Liverpool University Hospitals NHS Foundation Trust                            | Liverpool, UK                            |                                                         |                                                                                            |
| Karen                             | Williams     |                       |                  | Royal Liverpool University Hospital, Liverpool University Hospitals NHS Foundation Trust                            | Liverpool, UK                            |                                                         |                                                                                            |
| Anita K                           | Simonds      |                       |                  | Royal Brompton Hospital, Royal Brompton and Harefield NHS Foundation Trust                                          | Brompton, UK                             |                                                         |                                                                                            |
| Kate C                            | Tatham       |                       |                  | The Royal Marsden Hospital (London) and The Royal Marsden Hospital (Surrey), The Royal Marsden NHS Foundation Trust | London, UK                               |                                                         |                                                                                            |
| Ethel                             | Black        |                       |                  | The Royal Marsden Hospital (London) and The Royal Marsden Hospital (Surrey), The Royal Marsden NHS Foundation Trust | London, UK                               |                                                         |                                                                                            |
| Shaman                            | Jhanji       |                       |                  | The Royal Marsden Hospital (London) and The Royal Marsden Hospital (Surrey), The Royal Marsden NHS Foundation Trust | London, UK                               |                                                         |                                                                                            |
| Georges                           | Ng Man Kwong |                       |                  | Royal Oldham Hospital, North Care Alliance NHS Group,                                                               | Oldham, UK                               |                                                         |                                                                                            |
| Ben                               | Messer       |                       |                  | Royal Victoria Infirmary, Newcastle Hospitals NHS Foundation Trust,                                                 | Newcastle upon Tyne, UK                  |                                                         |                                                                                            |
| Anthony                           | De-Soyza     |                       |                  | Royal Victoria Infirmary, Newcastle Hospitals NHS Foundation Trust,                                                 | Newcastle upon Tyne, UK                  |                                                         |                                                                                            |
| Paul                              | McAlinden    |                       |                  | Royal Victoria Infirmary, Newcastle Hospitals NHS Foundation Trust,                                                 | Newcastle upon Tyne, UK                  |                                                         |                                                                                            |
| Sophie D                          | West         |                       |                  | Royal Victoria Infirmary, Newcastle Hospitals NHS Foundation Trust,                                                 | Newcastle upon Tyne, UK                  |                                                         |                                                                                            |
| Vikram                            | Anumakonda   |                       |                  | Russells Hall Hospital, The Dudley Group NHS Foundation Trust                                                       | Dudley, UK                               |                                                         |                                                                                            |
| Paul                              | Dark         |                       |                  | Salford Royal Hospital, Northern Care Alliance NHS Group                                                            | Manchester, UK                           |                                                         |                                                                                            |
| Liam                              | McMorrow     |                       |                  | Salford Royal Hospital, Northern Care Alliance NHS Group                                                            | Manchester, UK                           |                                                         |                                                                                            |

\*Indicates required information. Only first name, last name, and suffix will appear in PubMed.

| *First Name and Middle Initial(s) | *Last Name  | *Suffix (eg, Jr, III) | Academic Degrees | Institution                                                                          | Location (city, state/province, country) | Role or Contribution, eg, chair, principal investigator | Group (if more than 1 Group listed in the byline) and/or Subgroup (eg, Steering Committee) |
|-----------------------------------|-------------|-----------------------|------------------|--------------------------------------------------------------------------------------|------------------------------------------|---------------------------------------------------------|--------------------------------------------------------------------------------------------|
| Tracy                             | Marsden     |                       |                  | Salford Royal Hospital, Northern Care Alliance NHS Group                             | Manchester, UK                           |                                                         |                                                                                            |
| Nicola                            | Proudfoot   |                       |                  | Salford Royal Hospital, Northern Care Alliance NHS Group                             | Manchester, UK                           |                                                         |                                                                                            |
| Bethan                            | Charles     |                       |                  | Salford Royal Hospital, Northern Care Alliance NHS Group                             | Manchester, UK                           |                                                         |                                                                                            |
| Jessica                           | Pendlebury  |                       |                  | Salford Royal Hospital, Northern Care Alliance NHS Group                             | Manchester, UK                           |                                                         |                                                                                            |
| Bethan                            | Blackledge  |                       |                  | Salford Royal Hospital, Northern Care Alliance NHS Group                             | Manchester, UK                           |                                                         |                                                                                            |
| Alice                             | Harvey      |                       |                  | Salford Royal Hospital, Northern Care Alliance NHS Group                             | Manchester, UK                           |                                                         |                                                                                            |
| Karen                             | Knowles     |                       |                  | Salford Royal Hospital, Northern Care Alliance NHS Group                             | Manchester, UK                           |                                                         |                                                                                            |
| Reece                             | Doonan      |                       |                  | Salford Royal Hospital, Northern Care Alliance NHS Group                             | Manchester, UK                           |                                                         |                                                                                            |
| Stephanie                         | Lee         |                       |                  | Salford Royal Hospital, Northern Care Alliance NHS Group                             | Manchester, UK                           |                                                         |                                                                                            |
| Jane                              | Perez       |                       |                  | Salford Royal Hospital, Northern Care Alliance NHS Group                             | Manchester, UK                           |                                                         |                                                                                            |
| Melanie                           | Slaughter   |                       |                  | Salford Royal Hospital, Northern Care Alliance NHS Group                             | Manchester, UK                           |                                                         |                                                                                            |
| Melanie                           | Taylor      |                       |                  | Salford Royal Hospital, Northern Care Alliance NHS Group                             | Manchester, UK                           |                                                         |                                                                                            |
| Victoria                          | Thomas      |                       |                  | Salford Royal Hospital, Northern Care Alliance NHS Group                             | Manchester, UK                           |                                                         |                                                                                            |
| Emma                              | Hardy       |                       |                  | Salford Royal Hospital, Northern Care Alliance NHS Group                             | Manchester, UK                           |                                                         |                                                                                            |
| Nawar                             | Bakerly     |                       |                  | Salford Royal Hospital, Northern Care Alliance NHS Group                             | Manchester, UK                           |                                                         |                                                                                            |
| Laura                             | Catlow      |                       |                  | Salford Royal Hospital, Northern Care Alliance NHS Group                             | Manchester, UK                           |                                                         |                                                                                            |
| Nasir                             | Majeed      |                       |                  | Salford Royal Hospital, Northern Care Alliance NHS Group                             | Manchester, UK                           |                                                         |                                                                                            |
| Dan                               | Horner      |                       |                  | Salford Royal Hospital, Northern Care Alliance NHS Group                             | Manchester, UK                           |                                                         |                                                                                            |
| Liaquat                           | Ali         |                       |                  | Scunthorpe General Hospital, North Lincolnshire and Goole NHS Foundation Trust       | Scunthorpe, UK                           |                                                         |                                                                                            |
| Dorothy                           | Hutchinson  |                       |                  | Scunthorpe General Hospital, North Lincolnshire and Goole NHS Foundation Trust       | Scunthorpe, UK                           |                                                         |                                                                                            |
| Liz                               | Fuller      |                       |                  | South Tyneside District Hospital, South Tyneside and Sunderland NHS Foundation Trust | South Shields, UK                        |                                                         |                                                                                            |
| James                             | Dodd        |                       |                  | Southmead Hospital, North Bristol NHS Trust                                          | Bristol, UK                              |                                                         |                                                                                            |
| Rahul                             | Bhatnagar   |                       |                  | Southmead Hospital, North Bristol NHS Trust                                          | Bristol, UK                              |                                                         |                                                                                            |
| Amelia                            | Clive       |                       |                  | Southmead Hospital, North Bristol NHS Trust                                          | Bristol, UK                              |                                                         |                                                                                            |
| Huzaiifa                          | Adamali     |                       |                  | Southmead Hospital, North Bristol NHS Trust                                          | Bristol, UK                              |                                                         |                                                                                            |
| Anna                              | Bibby       |                       |                  | Southmead Hospital, North Bristol NHS Trust                                          | Bristol, UK                              |                                                         |                                                                                            |
| Daniel                            | Higbee      |                       |                  | Southmead Hospital, North Bristol NHS Trust                                          | Bristol, UK                              |                                                         |                                                                                            |
| Hugh                              | Welch       |                       |                  | Southmead Hospital, North Bristol NHS Trust                                          | Bristol, UK                              |                                                         |                                                                                            |
| Emma                              | Gendall     |                       |                  | Southmead Hospital, North Bristol NHS Trust                                          | Bristol, UK                              |                                                         |                                                                                            |
| Louise                            | Staddon     |                       |                  | Southmead Hospital, North Bristol NHS Trust                                          | Bristol, UK                              |                                                         |                                                                                            |
| Anna                              | Morley      |                       |                  | Southmead Hospital, North Bristol NHS Trust                                          | Bristol, UK                              |                                                         |                                                                                            |
| Sam                               | Clarke      |                       |                  | Southmead Hospital, North Bristol NHS Trust                                          | Bristol, UK                              |                                                         |                                                                                            |
| Kerry                             | Smith       |                       |                  | Southmead Hospital, North Bristol NHS Trust                                          | Bristol, UK                              |                                                         |                                                                                            |
| Emily                             | Perry       |                       |                  | Southmead Hospital, North Bristol NHS Trust                                          | Bristol, UK                              |                                                         |                                                                                            |
| Naomi                             | Rippon      |                       |                  | Southmead Hospital, North Bristol NHS Trust                                          | Bristol, UK                              |                                                         |                                                                                            |
| Louise                            | Jennings    |                       |                  | Southmead Hospital, North Bristol NHS Trust                                          | Bristol, UK                              |                                                         |                                                                                            |
| Louise                            | Solomon     |                       |                  | Southmead Hospital, North Bristol NHS Trust                                          | Bristol, UK                              |                                                         |                                                                                            |
| Karen                             | Alloway     |                       |                  | Southmead Hospital, North Bristol NHS Trust                                          | Bristol, UK                              |                                                         |                                                                                            |
| Hannah                            | Lee         |                       |                  | Southmead Hospital, North Bristol NHS Trust                                          | Bristol, UK                              |                                                         |                                                                                            |
| Victoria                          | Sandrey     |                       |                  | Southmead Hospital, North Bristol NHS Trust                                          | Bristol, UK                              |                                                         |                                                                                            |
| Kirstie                           | Bradburn    |                       |                  | Southmead Hospital, North Bristol NHS Trust                                          | Bristol, UK                              |                                                         |                                                                                            |
| Alice                             | Milne       |                       |                  | Southmead Hospital, North Bristol NHS Trust                                          | Bristol, UK                              |                                                         |                                                                                            |
| Elizabeth                         | Goff        |                       |                  | Southmead Hospital, North Bristol NHS Trust                                          | Bristol, UK                              |                                                         |                                                                                            |
| Rachel                            | Williams    |                       |                  | Southmead Hospital, North Bristol NHS Trust                                          | Bristol, UK                              |                                                         |                                                                                            |
| Mohammed                          | Ahmed       |                       |                  | St George's Hospital, St George's University Hospitals NHS Foundation Trust          | London, UK                               |                                                         |                                                                                            |
| Clare                             | Ross        |                       |                  | St Mary's Hospital, Imperial College Healthcare NHS Trust                            | London, UK                               |                                                         |                                                                                            |
| Susannah                          | Bloch       |                       |                  | St Mary's Hospital, Imperial College Healthcare NHS Trust                            | London, UK                               |                                                         |                                                                                            |
| Serge                             | Miodragovic |                       |                  | St Mary's Hospital, Imperial College Healthcare NHS Trust                            | London, UK                               |                                                         |                                                                                            |

\*Indicates required information. Only first name, last name, and suffix will appear in PubMed.

| *First Name and Middle Initial(s) | *Last Name | *Suffix (eg, Jr, III) | Academic Degrees | Institution                                                                        | Location (city, state/province, country) | Role or Contribution, eg, chair, principal investigator | Group (if more than 1 Group listed in the byline) and/or Subgroup (eg, Steering Committee) |
|-----------------------------------|------------|-----------------------|------------------|------------------------------------------------------------------------------------|------------------------------------------|---------------------------------------------------------|--------------------------------------------------------------------------------------------|
| Ahmed                             | Zaki       |                       |                  | Stepping Hill Hospital, Stockport NHS Foundation Trust                             | Stockport, UK                            |                                                         |                                                                                            |
| Alistair                          | Roy        |                       |                  | Sunderland Royal Hospital, South Tyneside and Sunderland NHS Foundation Trust      | Sunderland, UK                           |                                                         |                                                                                            |
| Anthony                           | Rostron    |                       |                  | Sunderland Royal Hospital, South Tyneside and Sunderland NHS Foundation Trust      | Sunderland, UK                           |                                                         |                                                                                            |
| Lindsey                           | Woods      |                       |                  | Sunderland Royal Hospital, South Tyneside and Sunderland NHS Foundation Trust      | Sunderland, UK                           |                                                         |                                                                                            |
| Fiona                             | Wakinshaw  |                       |                  | Sunderland Royal Hospital, South Tyneside and Sunderland NHS Foundation Trust      | Sunderland, UK                           |                                                         |                                                                                            |
| Pamela                            | Bainbridge |                       |                  | Sunderland Royal Hospital, South Tyneside and Sunderland NHS Foundation Trust      | Sunderland, UK                           |                                                         |                                                                                            |
| Peter                             | Hersey     |                       |                  | Sunderland Royal Hospital, South Tyneside and Sunderland NHS Foundation Trust      | Sunderland, UK                           |                                                         |                                                                                            |
| Mark                              | Carpenter  |                       |                  | Sunderland Royal Hospital, South Tyneside and Sunderland NHS Foundation Trust      | Sunderland, UK                           |                                                         |                                                                                            |
| Claire                            | Leech      |                       |                  | Sunderland Royal Hospital, South Tyneside and Sunderland NHS Foundation Trust      | Sunderland, UK                           |                                                         |                                                                                            |
| Laura                             | O'Connor   |                       |                  | Sunderland Royal Hospital, South Tyneside and Sunderland NHS Foundation Trust      | Sunderland, UK                           |                                                         |                                                                                            |
| Andrew                            | Morrison   |                       |                  | Sunderland Royal Hospital, South Tyneside and Sunderland NHS Foundation Trust      | Sunderland, UK                           |                                                         |                                                                                            |
| Elaine                            | Rodgers    |                       |                  | Sunderland Royal Hospital, South Tyneside and Sunderland NHS Foundation Trust      | Sunderland, UK                           |                                                         |                                                                                            |
| Paul                              | McAndrew   |                       |                  | Sunderland Royal Hospital, South Tyneside and Sunderland NHS Foundation Trust      | Sunderland, UK                           |                                                         |                                                                                            |
| Gary                              | Lear       |                       |                  | Sunderland Royal Hospital, South Tyneside and Sunderland NHS Foundation Trust      | Sunderland, UK                           |                                                         |                                                                                            |
| Jim                               | Coates     |                       |                  | Sunderland Royal Hospital, South Tyneside and Sunderland NHS Foundation Trust      | Sunderland, UK                           |                                                         |                                                                                            |
| Maxwell                           | Richardson |                       |                  | Sunderland Royal Hospital, South Tyneside and Sunderland NHS Foundation Trust      | Sunderland, UK                           |                                                         |                                                                                            |
| David                             | Smith      |                       |                  | Sunderland Royal Hospital, South Tyneside and Sunderland NHS Foundation Trust      | Sunderland, UK                           |                                                         |                                                                                            |
| William                           | Green      |                       |                  | Sunderland Royal Hospital, South Tyneside and Sunderland NHS Foundation Trust      | Sunderland, UK                           |                                                         |                                                                                            |
| Sarah                             | Murray     |                       |                  | Sunderland Royal Hospital, South Tyneside and Sunderland NHS Foundation Trust      | Sunderland, UK                           |                                                         |                                                                                            |
| Christopher                       | Pennington |                       |                  | Sunderland Royal Hospital, South Tyneside and Sunderland NHS Foundation Trust      | Sunderland, UK                           |                                                         |                                                                                            |
| Huan                              | De Wong    |                       |                  | Sunderland Royal Hospital, South Tyneside and Sunderland NHS Foundation Trust      | Sunderland, UK                           |                                                         |                                                                                            |
| David                             | Land       |                       |                  | Southampton General Hospital, University Hospital Southampton NHS Foundation Trust | Southampton, UK                          |                                                         |                                                                                            |
| Helen                             | Wheeler    |                       |                  | Southampton General Hospital, University Hospital Southampton NHS Foundation Trust | Southampton, UK                          |                                                         |                                                                                            |
| Matt                              | Harvey     |                       |                  | Southampton General Hospital, University Hospital Southampton NHS Foundation Trust | Southampton, UK                          |                                                         |                                                                                            |
| Mark                              | Watson     |                       |                  | Southampton General Hospital, University Hospital Southampton NHS Foundation Trust | Southampton, UK                          |                                                         |                                                                                            |
| Michael                           | Brown      |                       |                  | Southampton General Hospital, University Hospital Southampton NHS Foundation Trust | Southampton, UK                          |                                                         |                                                                                            |
| Ben                               | Irving     |                       |                  | Southampton General Hospital, University Hospital Southampton NHS Foundation Trust | Southampton, UK                          |                                                         |                                                                                            |
| Julie                             | Bigg       |                       |                  | Southampton General Hospital, University Hospital Southampton NHS Foundation Trust | Southampton, UK                          |                                                         |                                                                                            |
| Mae                               | Felongco   |                       |                  | Southampton General Hospital, University Hospital Southampton NHS Foundation Trust | Southampton, UK                          |                                                         |                                                                                            |
| Joe                               | Mackenzie  |                       |                  | Victoria Hospital, NHS Fife                                                        | Kirkcaldy, UK                            |                                                         |                                                                                            |
| Devesh                            | Dhasmana   |                       |                  | Victoria Hospital, NHS Fife                                                        | Kirkcaldy, UK                            |                                                         |                                                                                            |
| Rob                               | Thompson   |                       |                  | Victoria Hospital, NHS Fife                                                        | Kirkcaldy, UK                            |                                                         |                                                                                            |
| Patrick                           | Lui        |                       |                  | Victoria Hospital, NHS Fife                                                        | Kirkcaldy, UK                            |                                                         |                                                                                            |
| Fiona                             | Adam       |                       |                  | Victoria Hospital, NHS Fife                                                        | Kirkcaldy, UK                            |                                                         |                                                                                            |
| Fleur                             | Davey      |                       |                  | Victoria Hospital, NHS Fife                                                        | Kirkcaldy, UK                            |                                                         |                                                                                            |
| Julie                             | Penman     |                       |                  | Victoria Hospital, NHS Fife                                                        | Kirkcaldy, UK                            |                                                         |                                                                                            |
| Amanda                            | McGregor   |                       |                  | Victoria Hospital, NHS Fife                                                        | Kirkcaldy, UK                            |                                                         |                                                                                            |
| Patricia                          | Cochrane   |                       |                  | Victoria Hospital, NHS Fife                                                        | Kirkcaldy, UK                            |                                                         |                                                                                            |
| Korah                             | Shalan     |                       |                  | Walsall Manor Hospital, Walsall Healthcare NHS Trust                               | Walsall, UK                              |                                                         |                                                                                            |
| Will                              | Bozic      |                       |                  | Warwick Clinical Trials Unit, University of Warwick                                | Coventry, UK                             |                                                         |                                                                                            |
| Jaclyn                            | Brown      |                       |                  | Warwick Clinical Trials Unit, University of Warwick                                | Coventry, UK                             |                                                         |                                                                                            |
| John                              | Carey      |                       |                  | Warwick Clinical Trials Unit, University of Warwick                                | Coventry, UK                             |                                                         |                                                                                            |
| Claire                            | Daffern    |                       |                  | Warwick Clinical Trials Unit, University of Warwick                                | Coventry, UK                             |                                                         |                                                                                            |
| Emily                             | Dight      |                       |                  | Warwick Clinical Trials Unit, University of Warwick                                | Coventry, UK                             |                                                         |                                                                                            |
| Matthew                           | Gane       |                       |                  | Warwick Clinical Trials Unit, University of Warwick                                | Coventry, UK                             |                                                         |                                                                                            |
| Belinder                          | Ghuman     |                       |                  | Warwick Clinical Trials Unit, University of Warwick                                | Coventry, UK                             |                                                         |                                                                                            |
| Jo                                | Grummett   |                       |                  | Warwick Clinical Trials Unit, University of Warwick                                | Coventry, UK                             |                                                         |                                                                                            |
| Johnny                            | Guck       |                       |                  | Warwick Clinical Trials Unit, University of Warwick                                | Coventry, UK                             |                                                         |                                                                                            |

\*Indicates required information. Only first name, last name, and suffix will appear in PubMed.

| *First Name and Middle Initial(s) | *Last Name    | *Suffix (eg, Jr, III) | Academic Degrees | Institution                                                      | Location (city, state/province, country) | Role or Contribution, eg, chair, principal investigator | Group (if more than 1 Group listed in the byline) and/or Subgroup (eg, Steering Committee) |
|-----------------------------------|---------------|-----------------------|------------------|------------------------------------------------------------------|------------------------------------------|---------------------------------------------------------|--------------------------------------------------------------------------------------------|
| Louisa Cat                        | Hamilton      |                       |                  | Warwick Clinical Trials Unit, University of Warwick              | Coventry, UK                             |                                                         |                                                                                            |
| Maddy Chockalingam                | Hill          |                       |                  | Warwick Clinical Trials Unit, University of Warwick              | Coventry, UK                             |                                                         |                                                                                            |
| Emma                              | Muthiah       |                       |                  | Warwick Clinical Trials Unit, University of Warwick              | Coventry, UK                             |                                                         |                                                                                            |
| Jeskaran                          | Padfield      |                       |                  | Warwick Clinical Trials Unit, University of Warwick              | Coventry, UK                             |                                                         |                                                                                            |
| Kerry                             | Rai           |                       |                  | Warwick Clinical Trials Unit, University of Warwick              | Coventry, UK                             |                                                         |                                                                                            |
| Greg                              | Raynes        |                       |                  | Warwick Clinical Trials Unit, University of Warwick              | Coventry, UK                             |                                                         |                                                                                            |
| Emily                             | Scott         |                       |                  | Warwick Clinical Trials Unit, University of Warwick              | Coventry, UK                             |                                                         |                                                                                            |
| Natalie                           | Stimpson      |                       |                  | Warwick Clinical Trials Unit, University of Warwick              | Coventry, UK                             |                                                         |                                                                                            |
| Adrian                            | Strickland    |                       |                  | Warwick Clinical Trials Unit, University of Warwick              | Coventry, UK                             |                                                         |                                                                                            |
| Jill                              | Willis        |                       |                  | Warwick Clinical Trials Unit, University of Warwick              | Coventry, UK                             |                                                         |                                                                                            |
| Ben                               | Wood          |                       |                  | Warwick Clinical Trials Unit, University of Warwick              | Coventry, UK                             |                                                         |                                                                                            |
| Inderjit                          | Attwood       |                       |                  | Warwick Hospital, South Warwickshire NHS Foundation Trust        | Warwick, UK                              |                                                         |                                                                                            |
| Penny                             | Atwal         |                       |                  | Warwick Hospital, South Warwickshire NHS Foundation Trust        | Warwick, UK                              |                                                         |                                                                                            |
| Rama                              | Parsons       |                       |                  | Warwick Hospital, South Warwickshire NHS Foundation Trust        | Warwick, UK                              |                                                         |                                                                                            |
| Shruthi                           | Vancheeswaran |                       |                  | Watford General Hospital, West Hertfordshire Hospitals NHS Trust | Watford, UK                              |                                                         |                                                                                            |
| Yadee M M                         | Konda         |                       |                  | Watford General Hospital, West Hertfordshire Hospitals NHS Trust | Watford, UK                              |                                                         |                                                                                            |
| Meera                             | Myint         |                       |                  | Watford General Hospital, West Hertfordshire Hospitals NHS Trust | Watford, UK                              |                                                         |                                                                                            |
| Ambreen                           | Mehta         |                       |                  | Watford General Hospital, West Hertfordshire Hospitals NHS Trust | Watford, UK                              |                                                         |                                                                                            |
| Alessio                           | Muhammad      |                       |                  | Watford General Hospital, West Hertfordshire Hospitals NHS Trust | Watford, UK                              |                                                         |                                                                                            |
| Adam                              | Navarro       |                       |                  | Watford General Hospital, West Hertfordshire Hospitals NHS Trust | Watford, UK                              |                                                         |                                                                                            |
| Saul                              | Rochester     |                       |                  | Watford General Hospital, West Hertfordshire Hospitals NHS Trust | Watford, UK                              |                                                         |                                                                                            |
| Manish                            | Sundayi       |                       |                  | Watford General Hospital, West Hertfordshire Hospitals NHS Trust | Watford, UK                              |                                                         |                                                                                            |
| Andrew                            | Patel         |                       |                  | Wishaw General Hospital, NHS Lanarkshire                         | Wishaw, UK                               |                                                         |                                                                                            |
| Colin                             | Smith         |                       |                  | Wishaw General Hospital, NHS Lanarkshire                         | Wishaw, UK                               |                                                         |                                                                                            |
| Matthew                           | Stewart       |                       |                  | Wishaw General Hospital, NHS Lanarkshire                         | Wishaw, UK                               |                                                         |                                                                                            |
| Erin                              | Tate          |                       |                  | Wishaw General Hospital, NHS Lanarkshire                         | Wishaw, UK                               |                                                         |                                                                                            |
| Claire (Rebecca)                  | McGarry       |                       |                  | Wishaw General Hospital, NHS Lanarkshire                         | Wishaw, UK                               |                                                         |                                                                                            |
| Berni                             | Pearson       |                       |                  | Wishaw General Hospital, NHS Lanarkshire                         | Wishaw, UK                               |                                                         |                                                                                            |
| Lynn                              | Walsh         |                       |                  | Wishaw General Hospital, NHS Lanarkshire                         | Wishaw, UK                               |                                                         |                                                                                            |
| Karen                             | Glass         |                       |                  | Wishaw General Hospital, NHS Lanarkshire                         | Wishaw, UK                               |                                                         |                                                                                            |
| Suzanne                           | Black         |                       |                  | Wishaw General Hospital, NHS Lanarkshire                         | Wishaw, UK                               |                                                         |                                                                                            |
| Rosalind                          | Clements      |                       |                  | Wishaw General Hospital, NHS Lanarkshire                         | Wishaw, UK                               |                                                         |                                                                                            |
| Chloe                             | Boyle         |                       |                  | Wishaw General Hospital, NHS Lanarkshire                         | Wishaw, UK                               |                                                         |                                                                                            |
| Leigh                             | MacDonald     |                       |                  | Wishaw General Hospital, NHS Lanarkshire                         | Wishaw, UK                               |                                                         |                                                                                            |
| Gayle                             | Hamilton      |                       |                  | Wishaw General Hospital, NHS Lanarkshire                         | Wishaw, UK                               |                                                         |                                                                                            |
| Raymond                           | Moreland      |                       |                  | Wishaw General Hospital, NHS Lanarkshire                         | Wishaw, UK                               |                                                         |                                                                                            |
| Harsha                            | Hamill        |                       |                  | Wishaw General Hospital, NHS Lanarkshire                         | Wishaw, UK                               |                                                         |                                                                                            |
| Sara                              | Reddy         |                       |                  | Wrexham Maclor Hospital, Betsi Cadwaladr University Health Board | Wrexham, UK                              |                                                         |                                                                                            |
| Andrew                            | Smuts         |                       |                  | Wrexham Maclor Hospital, Betsi Cadwaladr University Health Board | Wrexham, UK                              |                                                         |                                                                                            |
|                                   | Bentley       |                       |                  | Wythenshawe Hospital, Manchester University NHS Foundation Trust | Manchester, UK                           |                                                         |                                                                                            |
