# Supplementary material
Source: PubMed Central journal article supplement (PMC8787685)
Supplement: jama-e220028-s004.pdf [file jama-e220028-s004.pdf]

## Data Sharing Statement

Perkins. Effect of Noninvasive Respiratory Strategies on Intubation or Mortality Among Patients With Acute Hypoxemic Respiratory Failure and COVID-19. *JAMA*. Published January 24, 2022. doi:10.1001/jama.2022.0028

### Data

**Data available:** Yes

**Data types:** Deidentified participant data

**How to access data:** Available on application to the chief investigators via email: Prof Gavin Perkins ([g.d.perkins@warwick.ac.uk](mailto:g.d.perkins@warwick.ac.uk)) and Prof Daniel F McAuley ([d.f.mcauley@qub.ac.uk](mailto:d.f.mcauley@qub.ac.uk)).

**When available:** beginning date: 06-24-2022

### Supporting Documents

**Document types:** None

### Additional Information

**Who can access the data:** Researchers whose proposed use of the data has been approved

**Types of analyses:** For approved research purposes

**Mechanisms of data availability:** With investigator support, after approval of a proposal and with a signed data sharing agreement
